# Supplementary material for: Analysis of pulsed cisplatin signalling dynamics identifies effectors of resistance in lung adenocarcinoma
Source: eLife. 2020 Jun 9;9:e53367. doi: 10.7554/eLife.53367 (PMC7282820; doi:10.7554/eLife.53367)
Supplement: Figure 1—source data 1. [file elife-53367-fig1-data1.xlsx]

## Sheet: Raw Means
Cell line	Time	Akt Ser473 (75)	BAD Ser136 (26)	GSKa/b Ser21/Ser9 (18)	IRS-1 Ser636/Ser639 (76)	mTOR Ser2448 (46)	p70S6K Thr389 (55)	PTEN Ser380 (22)	S6 ribosomal protein Ser235/Ser236 (74)	ATR (Total) (21)	Chk1 (28)	Chk2 (35)	H2A.X (39)	p53 Ser46 (53)	MDM2 (67)	p21 (Total) (75)	pJNK (18)	pBad S112 (20)	pBcl-2 S70 (22)	pAkt S473 (47)	Active Caspase-9 (51)	p53 S46 (53)	Active Caspase-8 (78)	ATF2 Thr71 (20)	ERK1/2 Thr202/Tyr204 (38)	HSP27 Ser78 (51)	JNK Thr183/Tyr185 (34)	MEK1 Ser217/221 (27)	P38 Thr180/Tyr182 (36)	P53 Ser15 (53)	P90RSK Ser380 (35)	STAT3 Ser727 (52)	Active Caspase 3 (57)	BCL-XL/BAK Dimer (47)	MCL1/BAK Dimer (54)	Survivin (20)	BAD (73)	BAX/BCL2 Dimer (42)	BCL-XL (22)	BIM (12)	MCL-1 (18)	TGFbRII (35)	pERK1/2 (42)	pSmad2 (43)	pAkt (47)	pSmad3 (64)	pSmad4 (67)	pSTAT1 Y701 (61)	pc-Jun S63 (56)
A549	0	1921.5	870.5	8635.17	735.333	1581.67	1171.33	2643.5	15153.8	827.333	123.667	89.3333	84.3333	271.333	1625	6974.67	57.1667	980	39.8333	271	371	712.667	88	180.167	83	75.5	23	5085.83	109.167	56.5	27.1667	2973.83	125.167	1391	40	51.6667	68.3333	31.8333	9324.17	131.333	105.333	852.333	337.667	643.667	721.333	205.667	3813.5	77.1667	166.5
A549	2	5854.67	726	10877.3	924.667	1397.17	1244.17	2554.33	14714.2	722.167	541.333	164.167	93.6667	642	1623	6514.17	77.6667	1460.17	39.5	561.167	320.833	1118	94.3333	204.5	93.5	74.5	26.3333	6173.5	108.667	82	30	3264.5	104.333	1310.17	45.3333	52.8333	71.6667	32	9094.5	128.667	124	870.167	639.667	724	1212	217.333	3676.17	63.1667	128
A549	4	8756.5	838.167	11889.8	768.667	1506.33	1193	2474.33	15996.7	725.667	328.333	196.667	88.6667	1427.17	1724.83	7174.67	80.8333	1612.67	44	938.833	352.667	2295.83	104	198.833	127.667	74.6667	25.6667	6706	112.667	198	37.8333	4336.67	100.667	1361.67	44.3333	57	73.5	35.3333	9557.83	120.167	128	771.667	1164.33	917	1968.83	255.5	4039.67	50.6667	88
A549	6	6387.83	1086	11329.8	735.167	1498.33	1189.5	2425.83	15444.2	698	385	249.167	84.3333	2225	2769.33	9567.17	97.5	1593.17	43.5	833.667	361	3889.33	99.5	190.167	97.3333	75.6667	26.6667	4639.33	109.833	304.833	34.6667	4051.67	90.6667	1401.33	36.8333	58.3333	66.8333	29	9275.5	109	120.667	704.833	795.333	726.333	1738.33	265.333	4363.83	72.3333	172.167
A549	8	5371	798.333	11246.5	749.333	1370.33	1232.83	2623.33	14465.7	690.667	491.167	235.167	86.8333	1922	3058.67	10883.8	116.333	1328.33	40.3333	734.667	312	3337	94.3333	195.667	95.6667	77	27.8333	4573	110.667	313.333	32.3333	4016.67	84.8333	1419.67	38	63	71.6667	31	9416.17	112.5	123.333	666.667	795.5	628.167	1660.5	235.5	4536.83	56.1667	102.333
A549	12	8586	915.667	11014.8	756	1525.5	1296.17	2718.17	14846	768	629.667	252	80	3216.33	3569.5	14539.8	127.333	1384.33	44.6667	897.833	340.167	5728.33	100.333	226	99.3333	71.6667	29	4666.5	107.5	662	33.6667	4680.33	88	1708.67	39.8333	71	79	33.6667	10320.8	112.667	132	846.5	767	604	1845	225.833	4956.5	51	113.333
A549	16	12119.8	932.5	11887	772.667	1793.67	1432	2895.67	15525	1219.33	910.833	341	89.3333	6423.83	5280.17	18607	192.5	1307.17	37.3333	1050.67	287.833	9173.67	92.1667	259.333	110.167	78.3333	26.3333	4420.33	116	2385.33	36.3333	6384.83	89.6667	2263.17	59.3333	67.3333	91	30.3333	9794	92.6667	129	900.667	939	451	2038.17	175	5293.17	52	74.1667
A549	20	12350	1633.33	11475.5	690.833	1733.33	1464.67	3358.67	16153	1369.17	1077.17	409.667	87.3333	8303.33	6438.67	23655.7	144.833	1283.33	38.5	1095	298.667	11032.7	89.8333	232.667	102	80.3333	32.3333	4770.33	117.167	3862.67	38.3333	7693.33	93.3333	1942.17	48.3333	65.6667	99.6667	29	11045.7	98	139.833	976.5	660.5	446.833	2321.5	197.333	5474.5	52.6667	62
A549	24	10298.3	1606.67	10634	535	1274	1232.83	2693.33	14622.2	1173.17	696	387.333	90	7100.17	5628.83	26656.7	146.333	1279.5	37.3333	863.333	330.833	10376.7	85.3333	150.667	79	73	25	1824	104.667	1153.83	27.6667	4913.17	93.3333	1862	49.3333	66.5	95.3333	27.8333	10394.2	90.6667	118.333	1120.5	781.667	452.667	1973.33	200	5674	50	76.3333
A549	36	8843	1434.5	10030.7	544.667	1487	1330.67	3306.17	15362.3	1051	309.167	351	83.1667	4417.33	4473.33	31232	154.333	1253.83	33	755.5	411.167	7716.5	86	173	74.3333	70.6667	25.1667	2094.33	107.333	651.333	28	5894.67	97.3333	1618.5	46.6667	55.8333	96.3333	29	11022	91.5	114.333	1386.67	577.333	400.5	1591.33	181.167	5257	47	54
A549	48	9769	2019.33	9730.5	497.833	1901.33	1467.83	4442.5	12872.5	1126.5	130.667	456.333	84	3979.33	4702.17	32520.2	146.5	1026.67	29.5	491.5	651.333	7426	83	237	75	73.1667	20	1476.17	110.667	1099	27.6667	6226.67	88	2299.17	60.1667	53.3333	129.667	29.3333	12124.8	90.3333	143.167	1728.5	477.5	442.333	1166.33	210	6028.83	48.5	46.6667
A549	72	6694.33	1991.67	9283.33	441.333	1730.83	1161.17	4698	11176.5	877.333	90	439.667	79.6667	2789.17	4384.67	32364.5	204	819.333	31	291.167	738.333	5172.5	80.3333	435.833	78.6667	72.8333	23.3333	1720.83	124	1400.33	28.3333	7876.67	97	3038.17	66.3333	51.3333	107.167	30.3333	11686.8	90.6667	94	1821.33	387.5	391.833	931.667	228.333	5159.33	55.3333	63.3333
NCI-H358	0	698.5	1446.67	4717	506	2555	1754.83	1170.5	4135	412.5	80.6667	93.3333	39.3333	33	493.167	2900.83	123	1822.67	37	268	94	83	89.8333	156.333	97	68.3333	55.3333	2224.83	126.667	36	408	1082.67	105.5	1415.33	54	44.3333	78.3333	31	4628.5	162.333	178.333	436.5	455.5	333	597.333	385	3530.67	77.6667	181.5
NCI-H358	2	377.167	550.333	4063.92	710.5	2924.5	2065.33	1252.67	3227.42	438.667	556.833	114.167	55.3333	41.5	519	3234.17	322	2530.5	36.6667	153.5	93.5	78.6667	88	227.667	77.1667	71.8333	95.1667	3187	133.667	34.6667	375	1765.67	94	1027.5	61.3333	47	72.3333	35.3333	4443.83	152.833	213	452.5	454.667	344.833	332.333	315.5	3845.33	68	462.5
NCI-H358	4	805	827.667	5495.33	616.167	2605.33	2399.33	1274.33	5795.5	503.333	407	164	62	40.3333	651.833	2886.33	303	2629.33	30.3333	364.333	86.3333	67.3333	82.5	164.667	111.333	73.3333	60.5	2174.33	129	31.6667	580.333	2214	112.833	1199.33	66.5	46.6667	79.6667	29	4670.5	142.667	241.667	454.833	969.833	344.333	956.333	324.667	3928.83	55.8333	194.833
NCI-H358	6	1331.17	1039.67	5427.33	643.333	2920.67	2539.5	1440.17	5608.17	431.5	255	177.667	59	36.1667	617.167	2563.67	193.5	2635.67	33.6667	469.5	107.667	82	90	155.333	129.333	70	64	2965.33	129	34.3333	588.333	2288	111.167	1846.33	67.3333	51.6667	106.667	29.1667	5534	156	277.167	438	843.167	339.333	1116	352	4270.17	64.6667	206
NCI-H358	8	1081.67	939.333	5506.5	588	2820.17	2518.33	1464	6071.33	521	352	227.5	71.3333	42.6667	798.333	4018	185.667	2519.5	37.3333	444.167	106.167	82	92.1667	152.5	117.5	65.5	63.75	2517.67	120.167	34.6667	473.75	1911.25	102.333	1377.17	59.1667	50.1667	100.333	31.3333	5376.33	151.833	237.333	439.333	710.833	313.667	1011	334.333	4045.67	61.3333	163
NCI-H358	12	1327.92	886.833	5057.92	569.333	2336.67	2224	1249.33	7534.83	703.667	573.667	220.833	65	44.6667	883.333	3290.83	154.833	2489.5	47.6667	388.5	132.5	108.667	107.167	179.667	110	70.1667	66.5	3536.17	130	36.5	469.667	2367.17	102.167	1947.33	74	59.6667	123	32.1667	5909.83	185.5	277.333	534.5	533.167	303.333	824	333.667	4387	65	174.5
NCI-H358	16	891.167	1699.17	3241.17	545.75	2363.67	2297.08	1266.17	5893.83	835.333	456.833	234.333	62.6667	40.6667	920.333	3112.33	287	2695.67	49	399.167	125	121.167	112	181.667	86.6667	67.6667	52.6667	2147.5	116.833	33.6667	574.167	2356.17	99.5	1525.67	80	60.5	142.333	34	5385	188.667	263	613.167	545.5	321.5	890.667	305.667	4625.83	73.1667	192.167
NCI-H358	20	1156.75	1439.08	4277.58	648.833	1741.67	2376.42	1263.42	6287.33	883.667	730.5	304.833	73	40.8333	975	4137.67	323.5	2348.67	38.1667	343.833	109	92.3333	99.5	185.833	110.5	73.6667	55	2688.5	129.333	39.6667	518.333	2675.33	92	1307.17	77.6667	60	152	34.6667	5458.17	193	284.667	601	760.667	304.5	793.5	290.833	4579.17	67	187.667
NCI-H358	24	1425.17	1115.67	4745.83	657.167	2819.17	2483	1280.67	6642.5	745.167	597.667	239	48.3333	40.3333	767.167	1834	238	2503.67	50.8333	391.667	134	150	117.667	207.5	115.333	67.3333	55	3066.83	126.333	35.3333	537.167	2785.67	122.833	1935.67	79.5	63.1667	139	32	5116.83	179.667	260.667	601.833	623.167	282.833	843.5	266	4376.33	69.5	180.167
NCI-H358	36	1836.33	1551.83	4706.83	731.667	2758.5	2601	1415.33	6206.33	949.667	454	312	64.5	46.3333	977.333	5665.33	245.167	2700.67	54.6667	418.333	165.167	178.5	135	177.333	140.167	70.6667	58.6667	4265.67	129.333	38.3333	656.167	3318.17	100.333	2235.83	94.3333	74.6667	146.333	29.3333	5412.67	188.167	295	738.833	935.833	320.167	1062.83	303.333	5107.17	66.3333	129.5
NCI-H358	48	1383.33	1884.83	4189.67	752.667	2510.5	1972.83	1428.17	5706.67	1381.83	541.333	397	67.8333	54.5	1088.33	13367	313.5	1571.33	45.6667	301.167	112.667	101.333	96.6667	168	81.5	71.6667	51	2311	123	37	363.667	2392.67	93	2165.33	85.6667	80.6667	190	28.6667	4556.67	184.167	268	704.333	502.333	282.833	740.333	276.5	5042.67	78.3333	176.333
NCI-H358	72	1238.83	2702.5	3625.5	576.333	2466.17	1231.67	1438	5082.5	1045.5	287.667	496.5	75.1667	46.3333	1053.5	17884.5	329.167	2443	37.5	264.167	149.667	85	95.1667	223.167	85.8333	75.6667	69.8333	2731.67	138	45.6667	368	2394	129.667	3743	91.8333	76.3333	271.333	26	4297.17	155.333	194.333	681	395	258.667	733.333	248.333	5389	89.8333	150.667
NCI-H1299	0	487.667	1913.33	6554.5	607.667	2366	955.333	981	3647.17	1328.33	149	150.833	67.8333	57.8333	610.667	778.833	152.521	842.319	32.7006	306.44	143.225	59.0257	100.899	677.833	60.3333	73.5	33	126.167	117.333	36	68.1667	1119.67	135.667	284.833	47.8333	85.1667	157.667	28.1667	799.167	157.333	149.333	432.667	261.833	1003.67	688.333	518.167	6059.33	75.6667	439.667
NCI-H1299	2	424.333	1964.17	5430	822.5	2774.33	804.667	1471.33	5293.33	1684	643.167	192	64	53	687.333	1193.67	237.693	870.948	27.2025	159.075	80.8398	34.2226	77.1653	1723.83	68.8333	78	53.8333	252.167	120.833	40	102.333	1742.83	119.167	447.833	71.1667	113.333	192.5	29	976.5	175.667	188.667	484.833	317.667	1331.67	456.167	603.333	6717.17	76	1549.83
NCI-H1299	4	732	2208.5	6486.83	631.667	1837.5	956.333	1065.67	4472.67	1361.67	425.833	244.333	74.6667	46.3333	615.333	529.833	305.672	1480.78	32.9337	394.793	90.4923	40.8587	83.6643	1007.67	80.6667	78.5	46.3333	212.833	128	39.6667	111.333	1313.17	110.667	472.5	55.8333	88.3333	262.167	30.6667	1275.67	181.833	239	411.667	354.167	1549.33	1175.5	653.833	6829.33	76.6667	1083.33
NCI-H1299	6	1034.17	2093.33	6406.33	476.167	1314.33	1007.67	1179	3435.17	1433.17	530.667	369.5	72.8333	43.8333	822.833	1074.67	197.383	1190.14	29.0947	366.192	80.8947	28.08	70.1727	722.833	103	89	39.5	225.5	140	39.3333	117.167	1517.5	122.5	416.667	71.5	79.8333	264	31.6667	1077.17	177.333	280.667	336.333	561.667	1072	1248	537.667	6218.33	74.6667	486.333
NCI-H1299	8	1048.5	2353.5	6340.67	688.167	3574.83	1455.83	1135.83	5874.83	1219	507.833	399.667	63.6667	49.6667	701.333	311.5	305.892	1262.64	23.0618	394.821	87.4485	32.0562	83.2255	733.333	96.6667	75.5	42.3333	303.167	120.667	34.6667	106.833	1541.17	146.833	566.833	84.3333	90.3333	286.667	25.3333	1219.17	175.5	309.333	408.833	396.833	1169.83	945	555.333	6620.83	71.5	466
NCI-H1299	12	897.833	1526	5534.67	796.667	3623.67	1206.33	1251	6607	1861.83	891.667	468.5	80.8333	54.6667	914	235.333	208.626	891.075	21.3891	223.16	59.6701	26.5718	50.5386	1656.17	83.8333	64.6667	62	516.333	108	37.1667	102.833	1794.67	235.167	729.667	90	108	274.167	21.6667	1363.33	182.167	291.333	583.833	326.5	977.167	563.5	475.833	7858.83	73.3333	581.333
NCI-H1299	16	619.167	2556.67	5673	562	3242	1121.17	846	4258.5	1733.67	1418.5	435.667	68.8333	47.1667	720.833	277.833	351.22	1184.85	35.6759	275.645	113.307	64.3867	123.508	990.667	80	72	49.1667	271.167	110.833	37	93	1596.33	126.333	742.667	90	105.333	338	24	1426.67	175.833	285.333	624.5	346.833	746.667	529	414.5	7692.33	74.3333	473.333
NCI-H1299	20	1145	2664.17	5709.67	480.167	3318.67	1030.17	755.167	2838.17	1840.67	1644.33	569	78.8333	47.1667	796.667	231.333	321.659	1083.47	35.7033	382.015	187.676	70.3098	138.426	1030.83	80.6667	68	51.8333	266.5	105.667	35.1667	91.6667	1611.67	171.333	866.833	93.8333	122.167	433.667	25.3333	1526	195.167	294	649.167	368.5	751.667	642.833	388.667	7978.17	75	444.333
NCI-H1299	24	725	2762.33	5871	471.833	2375.5	872.667	777.167	3988.67	1997	2563.33	619	90.8333	57.6667	859.667	226.167	293.415	1410.61	41.2151	386.375	126.223	60.7944	110.291	900.333	66.8333	73.6667	40.3333	187.667	112.667	37.8333	81.1667	1468.5	188.833	609.833	70.3333	110.667	337.833	22.6667	1143.17	175.167	223	531.333	321	649.167	600.667	355	7180.17	74.6667	297
NCI-H1299	36	1379.33	4020.17	5572.5	551.333	2371.33	987.833	761	3038.83	2523.33	1500.5	882.333	95.6667	65.6667	940.167	815	332.6	1582.41	48.9755	455.917	131.625	58.6006	120.629	1056.83	83.6667	69	56.3333	284.5	110	43	114.5	1986	319.333	773.833	85.8333	186.167	688.333	24.6667	1501.33	217.333	322.667	653	402.167	854.667	617.833	404.667	7755	74.3333	267.333
NCI-H1299	48	1079.17	5796.5	5259.33	755.5	2354.67	564.667	585.333	2339.17	2047.83	1067.67	932.167	109.333	58	811.167	999.5	440.231	1964.78	63.0156	319.301	262.236	86.8452	144.541	2615.83	87.6667	57.5	90.3333	320.667	89.8333	39	139.833	2438.67	1491.17	857	70.3333	245.667	1320.5	25.3333	1386	256.667	287.667	700.25	389.917	1035.83	466.667	448.917	7861.83	71.8333	560
NCI-H1299	72	846.167	5806.17	5554.83	396	2193.33	459.333	531.167	1705.5	1898.67	918.333	1134.83	209	50.3333	749.167	1079	414.729	2558.74	64.277	347.957	334.41	103.161	201.414	3478	93.1667	64.6667	96.3333	465.5	102.667	44.1667	162.667	2813	3588.83	660.167	58.1667	134.667	1599.83	26.3333	1470	270.833	203.667	544.25	356.5	744.833	619.667	348.25	7296.92	75.3333	518
NCI-H1573	0	1272.17	2780.17	2134.5	510.833	1956.33	1403.17	1776.67	7818.83	468	127	154.833	72.1667	2182.67	804	234.167	124.326	2359.49	60.4782	919.639	137.634	2913.06	100.235	328.333	79.5	78	30.5	696.333	113	547.667	60.5	1815.33	215	262.167	35.5	46	129	22.6667	2026.67	143.167	81.6667	261.833	367.5	359	1191.83	156	5080	64	88.1667
NCI-H1573	2	882.5	2034	2157.17	554.333	2487.83	1702.17	2054.33	7802.67	573.833	489.5	160.5	70.3333	5112.17	963.5	417.167	198.281	2753.19	61.3205	507.579	103.436	4162.04	92.3176	982.333	98.1667	77	48.1667	2966.67	130	1729.5	93.6667	3876.33	158.833	375.333	42	46.8333	169	24.3333	2632	143	138	282	572.333	398.167	848.667	156.667	5613.83	66.1667	205.333
NCI-H1573	4	2189.67	2714	2606	564.833	2264.5	1809.17	2008.67	7718.17	604.167	488.5	207.667	65	6183.67	1011.5	381.833	157.597	3564	49.1911	859.413	105.542	4496.19	84.7368	467	114	81	45.5	3132.83	145	2587.5	144.5	3939	200.667	432.667	40.3333	46.6667	196.333	22.5	2983	136.5	137.5	314.167	872.167	430.167	1922.83	189.167	6438.17	61.6667	127.167
NCI-H1573	6	2524.67	2177.17	2613.33	554.333	2207	1723.67	1974.33	7172.67	581.167	457.5	227.667	62.3333	7162.83	1003.33	328.833	187.583	3011.53	61.152	1085.57	115.818	3984.23	97.7927	458.833	133.667	81	38.3333	2135.67	136.333	2879	153.5	3541.33	193.333	388	35.3333	47.6667	190.5	21.3333	2640.67	133	120	259.667	1309	414	2121	202.167	6495.17	65	117.333
NCI-H1573	8	1930	2222.67	2785	533.167	2299.17	1719.83	1918.17	7552.83	773.333	755	302	68.6667	9716.83	1229.67	489.333	162.904	4027.27	80.9464	1261.62	148.837	6028.27	131.317	532	136.5	76.1667	39.8333	3212.17	131.167	3720.17	149.833	3601.5	73.3333	721	39.8333	49.3333	189	22	2515.67	144.333	128	256	1490.17	502.833	1791.67	216.167	6581.5	64.3333	100
NCI-H1573	12	1492	2104.67	2307.33	515	2312	1694.5	2064	7476.17	525.667	718.333	243	63.6667	9100.67	907	208	221.444	3599.71	79.346	887.546	139.487	11805.8	138.392	586.167	106.833	80	39.8333	2008.33	122	6614.17	104.333	3564.83	227.667	448.167	40	54.1667	167.667	21.8333	2368.67	147.167	111.167	261.333	954.5	493	1259.5	203.333	6296.5	63.6667	102
NCI-H1573	16	2653.83	3627.5	2581.17	549.5	2201.33	2064.17	2256.67	6972	617.833	829.833	303.167	78.5	9502.67	829	120.333	156.923	2665.33	67.2167	1377.35	169.137	5853.58	105.205	238.667	95.6667	68	39.3333	1304.17	110	4642.33	192.167	2408.17	194.667	583	47.3333	54.1667	242.333	24.3333	3083	155.667	127.5	308.833	1281.33	414.333	1634.33	180.333	6502.5	71.5	119.833
NCI-H1573	20	2518.5	2862.83	2289.5	522	2052.17	1946.17	2219	7385.33	692.833	896	313.333	79	10843.5	757.333	75.3333	167.115	3150.68	74.5448	1253.03	154.143	10530.3	129.548	169.5	81	71	36.3333	791.833	105.333	4728.17	140	1770.33	178.5	564.167	44	55.3333	205	24.6667	2978.67	145.167	105.667	322.333	928.333	436.167	1446.83	203	7146.33	73.3333	103.5
NCI-H1573	24	3196.33	3304.5	2576.33	471.667	2151.17	1821.33	2123	8255.83	594.167	972.167	320.167	70.6667	11059	665.333	59.8333	152.375	3941.36	53.2343	1537.31	152.712	16827.5	125.926	181.667	89.8333	65.3333	33.3333	748.5	96.6667	4912.83	150.833	1696.33	206.5	583.333	42.3333	52.5	233.667	23.6667	3006.33	156.667	108.667	341.167	1428.17	372	1867.17	187.667	6952.17	70.3333	102.833
NCI-H1573	36	2725.33	3890.5	2148.17	434.5	2124.17	1872.33	2297.83	4870.17	716.333	912.333	391.333	76.1667	12158.2	817.667	86.5	131.654	2505.46	43.8003	1064.01	135.36	11132.2	88.8641	179.667	79.1667	66	29.1667	601.667	103.5	7707.33	91	1611.33	208.833	594.833	42.8333	55	269.333	22.3333	2783.33	164	119.833	420	1042	459.667	1388.83	248.167	8148.67	66.3333	87.6667
NCI-H1573	48	2438.33	5172.17	1999	398.333	2382.83	1839	2437.67	5338.67	584.167	619.167	414.333	67.3333	12781.5	709.833	178.5	258.843	2654.3	57.0247	1332.79	239.386	10567.3	120.535	223.667	88.6667	71	38.8333	902.167	108.333	9017	82.8333	1791.5	208.667	566.5	48	56	350.333	22	2440.5	173.167	127.5	469.167	1398.33	505.667	964.667	286.333	8355	73.1667	100.167
NCI-H1573	72	1753.67	7039.17	1764.33	373	1929.83	1652.17	2294.5	3058.5	501.833	248	508	70.3333	11452.3	688.333	1149.67	381.821	453.67	57.7828	860.508	129.548	93.8338	71.7652	400.167	118.25	78.6667	51.3333	2345.33	123.5	13780	61.3333	3919.5	331.333	573	56	57.5	449.333	22	2075.33	205.333	158	458.5	3116.17	593.833	585.5	281.833	8117.33	70.6667	95.6667
NCI-H1975	0	2080.83	2221	2441	866.833	2193.5	1481.33	4431.5	6859.5	1289.33	74.1667	143.667	72.8333	6480.5	579.833	5295.67	213	2338	32	716	83.5	16171.2	76.5	339.333	183	89.3333	64.3333	551.167	165.833	4926.67	196.667	5062.33	67.5	1027.17	38.3333	43.3333	125.167	23.6667	3130.83	156.167	124	455.667	670.167	965.167	1860.33	341.5	5171	60.3333	257.167
NCI-H1975	2	592.333	1209.17	1932.67	824.833	2376.67	1012	4249.83	7664.67	1289	118	129.333	77.6667	7919.17	539.667	3252.5	241	3269.33	31.3333	277.667	66	15772.7	79.3333	262.5	106.667	99.3333	54	398.333	181.5	4983	176	5065.17	60.1667	659.167	34.6667	42.3333	146	24.3333	2679.5	127.333	129.667	399.833	376	832	743.5	304	4646.67	58.3333	272.833
NCI-H1975	4	4518.33	1661.5	2972	1277.83	2363.17	2035.83	4837.67	8299.5	1609.5	118.667	209.833	86.5	10090	691.333	6729.83	365.167	4577.67	36.6667	1451.83	87.1667	16521.2	78.6667	375.5	314.5	98.5	78.6667	1599.83	179.333	7668.33	403.333	7223.5	62.6667	1296.33	41	44.8333	253.333	25.6667	4415.67	150.333	216.333	363.5	1452.67	948.833	3496.17	322.5	4831.17	59.8333	496.167
NCI-H1975	6	3615.67	2054.67	2866.58	983.667	1876.83	1626.83	4600.83	7916	1467.17	101	232.5	76	10633.3	761.833	7737	316.333	3496	30.3333	1427.5	75.5	16313.3	74.1667	304.667	235	97.6667	60	599	173.5	8793.17	280.833	4435.5	69.6667	995.333	38.3333	45.6667	243	35.6667	4059.67	149	239.833	332	1166.33	1129.5	3021.5	356.167	4617.5	58.1667	356.5
NCI-H1975	8	3098.83	1557.33	2366.5	1064.33	2803	1664.83	4158.5	9803.17	965.333	133.333	211.667	65	10249	583.833	5330.83	265.167	3011.67	38.3333	947	95.5	16655	82.1667	403.667	230.333	88.6667	68.3333	686.333	172.5	12046.7	237.167	4903.67	256.167	657.667	45.3333	52.8333	247.333	23.6667	4125.5	143.833	212.667	351.667	715.167	1163.83	2288.33	360.667	4857.5	60	362.333
NCI-H1975	12	2605.5	1504.33	2155.83	947.833	3776.33	1338.83	4582.5	8479.83	1794.33	139	282.833	77.6667	9759	849.5	7037.33	175.5	2325.33	42.3333	656.5	128.833	16352.3	82.6667	364.333	198.833	95.3333	68	643.5	173	15576.7	184.333	4421	76.8333	1846	36.6667	70.6667	253.167	26.3333	4064.33	158.667	172	416	421.5	1183.67	1439.33	416.167	5490.17	63.3333	251.167
NCI-H1975	16	4721.67	2843.33	2375.33	857.833	4161.83	1796.67	5547.83	9525.83	1727	355.333	504.667	71.3333	13166.5	739	2461.17	440.833	2665.5	29.3333	778.167	93.6667	16678.7	72	505.5	251	92.3333	82.3333	1040.33	186	25684	273.667	5682.17	97.6667	1271.5	49.1667	51	350.667	25.3333	2652	192.667	188.667	695.333	1219.33	1217.17	2093.5	451.833	7393.67	61.6667	187.5
NCI-H1975	20	6414.83	2828.5	2569.5	976.833	4363.67	1621.17	5760.17	10665	1773.83	350.667	537.833	86.8333	15089.3	780.167	1900.67	478	2517.67	24.3333	792	85.6667	16873	69.8333	554.833	258.667	88.5	84.8333	1057.83	172	27690.7	277	6308.83	105.333	983.5	45.6667	49.8333	313.667	24.3333	2241	185.333	166.5	674	1406.33	834.167	2212.67	341	6908.17	61.3333	166.5
NCI-H1975	24	5422.67	2312.17	1935	871	3627.33	1817.67	5473.67	7848.5	1968.33	345.5	501.5	84.1667	14273.2	819.667	3749.83	464	2404.5	27.1667	831.667	92.3333	16001.8	70.3333	535.667	253.5	91	78.1667	1096.83	162.5	23799.5	269.667	5904	105.667	1278.5	49.8333	51.8333	331.167	23	2719.67	186.333	197.667	683.167	1523.33	1035.83	2157.83	407	6885	62.6667	184.333
NCI-H1975	36	5543	2924	1833.67	1139.33	4517.67	1786.83	6221.17	9793.83	2152	226	509.833	106	14769.3	975.167	5084.17	512	2012.67	27.6667	691	103	16193.5	70.6667	684.333	181.833	94.6667	84.5	794.5	179.333	25601	232	6754.33	130	1429.5	55.8333	65	339.167	22.3333	2717	183.333	166.333	705.5	704.667	662.5	1546.33	283.667	6761.33	61.6667	144.667
NCI-H1975	48	5500.5	2828.33	1348	822.167	3360	1420	6383.5	6746.17	1996.17	141.5	591.5	84	12153.5	858.833	8572.33	739.667	2309.67	33.6667	424.333	139.333	15511.8	77.3333	986.833	172.333	92	105.167	773.167	191	25306.5	185.167	6639.5	226.5	1765.33	63	64.5	618.833	26.3333	3078.67	193.167	160.667	802.667	616	520.333	1212.83	262.667	6810.83	68.3333	185.667
NCI-H1975	72	3972	4483.33	1871	524.667	3054.5	976.5	7177	6423	1932.67	108	863.333	87.6667	11818.7	725.667	11443.7	1056.75	2314.17	29.0833	354.25	189.667	15459.2	83.1667	1354.33	148.667	103	149.5	1007.67	234.333	23003.7	116	6577	438.667	1890.5	54.3333	53.5	726	35.6667	4082.17	193.333	155	871	398.167	387.667	810.833	248	5201.83	67	191.333
SW-1573	0	4695.83	599.5	7957.67	1578.17	1204.83	1015.67	2136.67	9495.5	766	86.3333	113	114.667	1688.33	4058.67	9462	372.333	842	53.6667	542	97.6667	5371.67	100.833	398.167	103.833	75	58	401.5	117.5	154	100	1406	80.3333	1669.67	31.3333	85.6667	70.3333	35.6667	14160.8	95.5	118	270	757.667	231.333	1317.67	163	47.1667	65.8333	475.667
SW-1573	2	1690.33	554	6442.33	2201	1310.5	1142.67	2496.83	9729.67	662.667	385.167	114.167	104.833	2494.17	3743.5	7656.5	715.5	832.5	37.8333	300.333	74.6667	5954	83.6667	648.833	107.333	95.6667	107.667	628.167	142.333	334	104.167	1460	82.6667	1482	32	90	60.3333	35.6667	13200.3	98.6667	109.833	314.667	1201.33	347.5	742.833	184.833	53.3333	61.6667	1280.17
SW-1573	4	1842	615.167	7389.33	1100.83	1195.33	1018.67	1692.33	9779.33	602.667	315.667	117.167	81.5	4340.67	4450	7399	407.167	751.167	43	401.833	72.3333	6939	78.5	742.333	107.667	97.1667	122.833	485.667	160.333	731.333	108.333	1411.83	84	2077.83	31.3333	112.667	72.6667	39	13116	104	88	252.5	467	291.5	986	176	43	54	1158.67
SW-1573	6	3066.33	728.5	7491.67	1305.5	1376.5	851.5	1887.67	9035.17	672.667	239.333	135.333	90.8333	6059.5	5235.5	11629.7	388	729.167	50.8333	511.667	86.8333	8690.33	96.3333	532.333	138.833	90.1667	79.3333	600.5	142	1169	119.667	1646.17	76.3333	1767.33	28	97.5	66.6667	32.6667	14148.8	96.3333	113.667	300.667	1083.33	278.667	1071.17	169.333	51	62.5	849.833
SW-1573	8	3318.17	540.167	7215.83	940.5	1193.17	789.333	1777.83	9871.17	516	197.833	113	85	4920.33	4728.17	8055.5	472	810.333	48.3333	459.833	83.3333	10287.3	94.3333	526.333	143.667	84.3333	73.8333	695.5	128.333	1592	105.667	1561	79.6667	1839	30	103.333	68.6667	30.3333	13302.2	94.3333	113	272.5	1224.17	242.833	961.333	136.833	55.6667	60.6667	776.833
SW-1573	12	2374.17	508.333	6780.33	930.833	1211	856.667	1738	10629.8	495	293.667	112.833	83	5973	4787	6600.33	582.167	1021.67	49	480.5	88.1667	12367.8	99	563.333	133	82.3333	74.6667	605.833	127	2186	106	1572.67	87.1667	2067.83	32.3333	106.833	75.6667	32.6667	13349.2	98.3333	117	307.667	1316.83	245	1044	161.333	58.8333	63.3333	939.667
SW-1573	16	5474.17	549.833	7213.33	731.833	1213.83	1073	1670	12291	483.667	427.833	125.333	76.8333	8622.5	4703.17	8993.33	1379	1204	38.3333	876	86	15389	85.5	840	135.333	81	146.167	633.5	127.667	7033.33	118	2083.33	94	3117	33	106.667	108	37	13173.3	114	91.6667	300.333	1727.83	261.833	1716.67	162.5	58	58	1410.33
SW-1573	20	4273	658	7697.83	860.333	1184.83	1032.33	1808.17	12166.7	627.833	459.667	140.5	84.5	9375.83	4958.5	8908.33	1749	1186	38.5	825.667	78.6667	15113.5	84	756.333	127.333	92	174.833	517.167	135.667	6324	126.5	2084.67	81.3333	2321.33	28	81	86	33	12191.5	97.8333	67.1667	312.833	1920.5	313.333	1752	191.5	62.1667	63.6667	1683.17
SW-1573	24	3088.67	846.667	6457.83	993.5	1292.33	1276.5	1966.33	11531.8	583.167	444.5	131.333	86.3333	7103.5	4779.33	7891.83	1672.17	954.833	39.1667	728.333	82.8333	12973.8	82.3333	934.5	107.333	93.5	208.167	398.833	127	4231.67	120.833	1887.67	89.3333	2663.67	31	97	88.8333	33	14011.8	97	73.6667	263.167	918.333	229	1201.83	115	43.3333	66	1882.67
SW-1573	36	4463.33	812.667	7430.17	885.667	1454.17	1224.5	1833.83	11913.3	633.667	470.833	150.167	105.833	10427	5871	22071.8	1396.83	1263.5	52.5	740.333	120.333	15185.7	97.5	824.833	113.5	133.833	436	803.333	153.667	12312.8	144.333	2289.67	379.333	3257.5	30.6667	75	124.667	32.6667	12593.7	98	107	249.333	808.333	240.167	1547.83	137.833	44	63	3617.67
SW-1573	48	3284.17	976	7497.17	730.833	1464.67	1063.5	1993	8998.17	668.167	390.333	150.833	94	10339.3	6272.17	25482.3	1764.33	1138	35.6667	620.667	87.8333	14726.7	80.8333	1303.83	103.333	97.8333	250.667	519	132.667	9835.17	140.667	2273.5	475.667	3556.5	33.6667	77.1667	142.667	35.3333	14305.7	107.667	143	298.833	1051.83	250.5	1276.5	166	54	70.1667	3434.83
SW-1573	72	1428.67	637.333	6096.17	546.833	1504.17	609.333	1941.5	8823.33	761	158.5	150.5	91.3333	9063.67	7085.33	24259.3	1500.5	879.333	34	351.667	76.5	9576.17	77.3333	1621	122.667	93.6667	182	826.5	136.333	8459.67	159.667	3729	692.333	3435.33	33.1667	69.8333	99.5	33.6667	14938.8	115.333	84.6667	294.833	1328.17	223.167	836	176.5	46.6667	65.8333	2516.5
[truncated: 5 more columns]

## Sheet: Standard Deviations
Cell line	Time	Akt Ser473 (75)	BAD Ser136 (26)	GSKa/b Ser21/Ser9 (18)	IRS-1 Ser636/Ser639 (76)	mTOR Ser2448 (46)	p70S6K Thr389 (55)	PTEN Ser380 (22)	S6 ribosomal protein Ser235/Ser236 (74)	ATR (Total) (21)	Chk1 (28)	Chk2 (35)	H2A.X (39)	p53 Ser46 (53)	MDM2 (67)	p21 (Total) (75)	pJNK (18)	pBad S112 (20)	pBcl-2 S70 (22)	pAkt S473 (47)	Active Caspase-9 (51)	p53 S46 (53)	Active Caspase-8 (78)	ATF2 Thr71 (20)	ERK1/2 Thr202/Tyr204 (38)	HSP27 Ser78 (51)	JNK Thr183/Tyr185 (34)	MEK1 Ser217/221 (27)	P38 Thr180/Tyr182 (36)	P53 Ser15 (53)	P90RSK Ser380 (35)	STAT3 Ser727 (52)	Active Caspase 3 (57)	BCL-XL/BAK Dimer (47)	MCL1/BAK Dimer (54)	Survivin (20)	BAD (73)	BAX/BCL2 Dimer (42)	BCL-XL (22)	BIM (12)	MCL-1 (18)	TGFbRII (35)	pERK1/2 (42)	pSmad2 (43)	pAkt (47)	pSmad3 (64)	pSmad4 (67)	pSTAT1 Y701 (61)	pc-Jun S63 (56)
A549	0	670.335	187.643	12.8582	40.3247	322.435	130.508	239.767	508.901	46.7021	3.51188	7.23418	20.7445	6.65833	112.054	597.156	4.04145	46.4866	2.02073	16.4621	35.6791	20.5508	5.40833	14.2507	4.3589	3.1225	1.73205	259.314	5.57524	1.32288	2.36291	411.95	10.251	65.5973	1	1.1547	9.07377	2.36291	122.312	8.0829	5.85947	10.0167	34.4976	40.157	5.50757	18.4481	95.9544	5.00833	13.4443
A549	2	774.724	160.636	976.406	135.5	80.8306	54.9462	239.511	1151.36	76.6621	66.7539	21.3561	19.7315	82.1462	129.036	595.07	2.08167	80.6417	4.09268	34.3523	19.5853	109.302	1.52753	31.5872	11.758	3.96863	1.1547	1456.24	11.1505	10.4403	4	373.311	10.116	154.367	1.1547	2.92973	1.52753	1.73205	284.131	3.68556	2.64575	65.254	89.9407	62.6019	28.931	18.7105	545.251	8.25126	20.4756
A549	4	905.981	175.411	70.7837	40.0666	57.2917	118.647	106.884	509.295	71.5984	30.872	13.0512	24.8462	120.119	94.8187	655.086	7.81558	71.3886	2.64575	67.8976	4.07226	73.5091	3.4641	24.2092	18.3394	4.04145	1.52753	1497.87	6.65833	48.7545	4.31084	654.848	3.51188	133.665	0.57735	1	2.5	3.05505	121.82	2.75379	4.3589	37.5278	69.7878	85.4225	87.539	23.1787	262.003	2.88675	2.64575
A549	6	509.419	149.251	487.538	96.167	204.784	104.173	237.183	735.62	82.8417	18.0278	6.33114	2.3094	83.3607	137.958	516.303	13.4443	109.506	4.272	61.8493	13.6107	242.587	5.22015	27.3145	1.52753	2.51661	1.52753	528.719	2.25462	66.9745	4.04145	452.83	7.02377	152.553	4.31084	2.51661	5.29937	1.73205	474.86	1.73205	12.5033	69.1815	146.193	73.2143	145.688	10.116	455.107	1.52753	5.96518
A549	8	1372	137.158	141.881	51.04	82.7305	79.7564	82.2091	311.806	21.0614	47.1018	23.0018	12.5532	146.359	124.187	480.11	11.0604	78.239	4.93288	75.0838	4.3589	432.542	4.04145	5.68624	5.50757	3.4641	2.02073	476.362	2.08167	43.4089	2.51661	241.247	0.763763	4.04145	1	3.5	3.21455	2	207.778	6.53835	3.05505	40.5041	94.4815	11.7296	200.98	3.1225	215.025	2.92973	0.57735
A549	12	338.39	105.154	483.535	37.7227	90.6242	34.6206	29.9012	835.519	80.5543	81.6844	8.544	5.56776	149.286	276.481	690.37	3.05505	58.2588	2.3094	40.3247	10.7742	126.065	5.29937	1.73205	2.88675	2.3094	2	413.631	2.17945	13.8564	1.52753	220.219	1.73205	39.6274	0.288675	1	3.04138	3.51188	293.34	7.50555	3.60555	62.1068	87.0689	50.9191	152.62	19.8389	228.415	1	2.88675
A549	16	511.018	109.168	897.136	64.5006	164.628	68.5219	135.19	435.246	40.5134	156.399	13.4536	17.3877	826.616	380.381	421.463	29.0646	52.1592	2.88675	59.702	4.0104	1300.84	5.00833	2.75379	3.75278	3.21455	2.51661	208.349	1	586.7	4.04145	325.433	3.05505	357.65	3.51188	2.88675	4.3589	0.57735	199.682	4.50925	3.60555	97.1665	133.671	15.1327	426.682	19.4679	129.271	1	1.89297
A549	20	1875.02	220.043	672.228	42.3802	218.944	120.571	347.779	511.207	59.0854	92.6692	66.911	9.07377	1072.29	160.893	1216.43	7.28583	53.0786	1.32288	91.3934	2.88675	1828.82	2.02073	30.5341	3.60555	2.3094	2.3094	364.434	0.763763	1259.08	3.51188	277.195	4.6188	155.358	5.1316	6.1101	10.0167	2.64575	679.082	6.55744	8.69387	66.0473	52.2661	27.5877	299.041	18.5831	381.575	5.1316	7.81025
A549	24	479.469	20.0769	172.259	19.2873	57.9396	38.6081	68.2959	564.607	123.029	49.0077	14.1892	3	497.044	257.371	518.7	5.03322	71.8175	2.3094	61.7117	24.4251	404.193	7.0946	7.37111	1	2.64575	2.64575	246.385	5.20416	164.366	0.57735	360.365	1.52753	41.328	1.1547	2.78388	14.0119	0.288675	854.542	5.1316	16.8028	54.1733	85.0593	30.6649	274.962	26.6271	300.202	4	5.85947
A549	36	1478.01	106.772	379.955	20.7926	60.2329	93.222	144.572	278.097	80.9877	13.5493	33.0454	6.78847	235.715	133.463	231.255	13.7143	56.2546	1	9.5	10.2997	441.401	6.9282	3.60555	1.52753	1.52753	1.89297	19.218	3.21455	43.3859	2	182.155	1.1547	21.2897	3.05505	2.02073	14.1892	2	952.63	9.83616	18.5831	167.947	132.787	38.9358	240.017	26.4874	572.383	5.19615	10.3923
A549	48	1071.17	228.675	199.017	44.5879	95.9236	56.3922	130.443	720.998	45.1027	5.50757	12.4231	5	353.951	68.1548	319.436	12.2168	45.7092	0.866025	37.5133	22.8108	300.604	3.60555	60.3987	5.56776	4.64579	1	213.852	4.04145	651.971	2.51661	633.787	1.73205	124.288	2.75379	2.08167	21.2211	2.08167	1001.38	11.2398	18.8702	39.7524	52.9646	11.3725	235.233	21.5174	137.225	3.04138	5.85947
A549	72	943.456	374.919	831.721	14.9778	151.377	51.697	702.541	1746.52	29.1433	7.2111	41.8818	6.65833	374.502	256.067	349.752	62.1068	51.9359	1	14.8689	19.6554	388.644	5.68624	76.4793	1.1547	1.25831	1.1547	168.335	2.64575	410.076	1.52753	248.52	10.3923	719.104	7.76745	4.50925	17.4666	0.57735	694.733	3.21455	14.5258	238.856	46.6289	46.288	7.02377	11.5902	357.974	0.57735	2.08167
NCI-H358	0	67.5074	233.402	72.581	31.1769	69.5414	174.058	27.9866	435.055	110.047	31.5212	23.4379	14.2945	8.18535	114.364	754.678	8.18535	91.4827	2	19.0788	2.29129	2.64575	4.25245	33.6316	10.583	2.08167	14.0119	1050.73	12.5033	2.64575	94.6203	131.325	12.7574	388.801	4.3589	3.05505	5.85947	0	120.73	3.78594	9.29157	18.214	5.63471	20.5183	63.5715	10.4403	413.142	10.504	15.0582
NCI-H358	2	38.5822	128.555	86.1018	81.4125	512.452	322.553	186.605	320.203	77.938	56.4055	13.1561	5.85947	5.76628	43.0929	611.155	46.3492	91.0041	1.60728	20.1308	9.6566	7.37111	1	13.5769	7.25144	7.81558	7.52219	696.248	10.0664	6.02771	20.2978	167.375	8.7178	265.51	8.5049	3.4641	10.2632	2.08167	624.427	8.97682	32.078	26.4244	31.0698	20.9304	38.397	18.2962	295.772	5.56776	24.1402
NCI-H358	4	114.013	142.243	215.435	31.8604	168.055	141.426	149.257	765.265	23.0994	33.0606	22.0681	6.08276	2.08167	9.38527	1264.82	31.7648	59.1974	1.1547	3.21455	4.16333	7.37111	3.1225	25.1711	8.32666	2.51661	5.76628	39.9291	8.32166	2.08167	80.3886	185.793	6.89807	316.664	3.90512	0.57735	6.02771	2.64575	351.35	4.04145	10.2144	11.2509	85.3263	14.0475	13.0128	19.3477	124.774	5.20416	29.0014
NCI-H358	6	31.2823	207.143	161.544	20.5264	238.874	81.9039	63.5144	290.781	42.0089	13	14.8436	1.73205	2.75379	41.0498	238.664	8.4113	108.187	4.16333	26.613	11.1505	7.93725	5.2915	6.4291	11.0151	6.245	4	180.538	7.54983	3.51188	25.6921	102.015	5.61991	253.551	9.07377	4.93288	3.51188	2.02073	181.304	2	15.8298	10.8282	67.7538	4.16333	27.7849	25.8699	166.073	4.53689	28.3593
NCI-H358	8	112.882	111.433	253.01	29.8161	190.265	131.184	131.437	936.782	214.112	71.6258	52.7565	14.2945	1.52753	218.198	2262.13	19.7569	30.0042	3.21455	11.5578	5.75181	8	0.763763	1.5	2.17945	0.866025	14.1797	612.021	13.326	2.08167	47.1851	925.182	2.84312	247.685	9.54376	0.763763	11.9304	3.05505	254.657	4.19325	7.02377	23.4858	79.6717	11.5578	64.467	6.4291	207.572	1.52753	9.64365
NCI-H358	12	139.853	223.062	360.005	78.2821	435.519	328.744	180.666	1357.95	106.006	78.7676	25.7504	11.5326	4.04145	130.286	1249.52	14.2858	34.9678	1.1547	32.2529	5.76628	2.08167	5.00833	3.05505	4	6.33114	4.5	268.581	6.55744	4.7697	2.88675	95.5436	7.32006	249.893	9.53939	3.78594	13.0767	1.04083	137.081	6.26498	16.1735	33.3654	19.2765	13.7961	31.749	15.6711	257.286	4.58258	10.4762
NCI-H358	16	150.856	247.685	1795.04	142.699	388.054	348.363	257.061	1160.23	187.5	97.7885	34.5302	26.2742	9.29157	100.152	3206.63	18.5203	109.51	2	14.373	6.38357	4.48144	3.60555	26.04	9.29157	4.04145	5.3929	379.752	5.57524	5.68624	35.9942	140.189	5.89491	324.496	16.5907	4.33013	31.8172	4.3589	554.3	16.1581	41.9047	36.1259	100.258	3.5	48.5627	9.07377	222.862	3.01386	9.67385
NCI-H358	20	153.716	494.104	352.123	69.922	388.891	307.814	147.738	1090.03	186.167	175.464	39.3838	13.7477	7.75134	135.348	1867.1	31.9257	12.21	2.84312	51.2209	6.87386	6.65833	0.866025	22.6182	10.0374	3.05505	6.08276	431.008	9.0185	5.03322	33.9644	178.355	2.64575	419.541	12.2202	2	14.5258	0.57735	444.472	23.516	30.3535	40.5093	49.3288	24.0676	107.083	9.00463	283.85	1.73205	16.0416
NCI-H358	24	123.764	125.62	567.768	38.3156	166.234	90.6035	84.2931	506.276	212.621	165.276	41.8688	3.05505	2.88675	183.331	1678.77	22.7156	73.4597	2.36291	50.0633	7.81025	7.2111	3.61709	17.6847	15.885	8.14453	10.583	541.386	9.07377	3.21455	107.662	405.321	9.64797	220.953	7.85812	1.25831	14.7309	3	397.033	15.9478	16.1581	16.1581	152.57	6.75154	95.1683	9.12414	24.4404	4.7697	18.6436
NCI-H358	36	174.787	330	169.073	49.4402	619.583	116.22	90.124	544.766	15.0444	21.7428	18.0278	5.67891	2.08167	29.7714	1873.99	33.6539	187.34	8.5049	120.401	15.185	25.2834	12.2882	1.44338	11.8779	4.93288	10.0167	319.885	8.14453	3.78594	47.2502	121.501	7.07696	412.706	10.7858	3.05505	2.88675	4.16333	308.004	4.72582	8.66025	46.6217	47.5193	17.3949	85.6363	15.308	175.77	3.05505	28.5175
NCI-H358	48	290.829	619.904	486.231	27.8852	261.81	61.92	47.6454	207.967	125.186	68.6555	40.6325	2.75379	2.29129	68.391	892.997	10.0374	1281.37	9.71253	37.4444	49.9733	58.1062	36.1156	5.56776	10.5	7.50555	5.56776	526.346	16.1787	4.58258	67.2632	164.467	7.39932	593.315	15.6711	3.17543	7	2.51661	369.823	12.4231	15.7162	26.4071	94.1413	3.81881	70.946	9.04157	222.767	4.50925	13.6137
NCI-H358	72	91.9787	940.923	273.464	29.4845	384.471	57.8389	7.93725	341.987	221.73	21.5484	25.2042	4.75219	2.08167	111.621	1991.09	18.9231	276.168	2.29129	9.69966	19.8578	17.8955	12.2712	15.7824	1.25831	2.51661	8.60717	413.382	3.4641	3.78594	16.7033	216.619	31.2623	820.773	14.092	2.08167	12.2202	1.73205	487.437	4.50925	10.4083	47.2864	72.7788	26.1598	108.264	34.1223	399.271	10.1036	21.7792
NCI-H1299	0	27.4287	56.1902	406.614	88.0076	191.914	102.109	73.1625	510.588	94.6273	3.4641	2.75379	10.4921	11.8568	19.6554	111.223	14.6433	172.018	3.33176	43.5186	3.04383	14.2731	14.9312	32.6548	1.52753	0.866025	1.73205	11.5145	8.0829	2	2.75379	30.9246	25.5799	29.7335	4.25245	3.01386	30.6649	2.92973	143.501	10.4921	29.023	32.6548	15.1355	117.475	95.4481	66.3218	545.887	8.0829	64.941
NCI-H1299	2	46.929	503.153	290.789	336.912	11.8568	31.3143	157.579	149.654	24.6374	161.688	17.4356	4.58258	5.2915	21.5484	369.016	163.473	548.81	6.00108	36.4541	33.4434	12.1185	43.1489	566.758	6.33114	1.73205	13.1371	91.5619	2.25462	4.3589	17.0978	208.381	24.3225	151.844	38.4068	35.6978	21.0178	5.2915	130.63	4.72582	19.1398	37.0281	11.5902	36.8284	31.8447	30.3699	339.266	6.08276	236.57
NCI-H1299	4	127.027	376.909	644.16	133.178	735.297	41.0406	181.009	856.524	164.26	55.1324	28.9194	15.9478	1.52753	46.3069	75.3033	78.5595	364.119	3.12646	68.9244	11.8463	8.18093	4.96261	162.666	6.80686	0.866025	5.7735	19.3671	1.80278	3.05505	10.6927	740.615	15.6312	51.9687	6.29153	7.50555	40.94	1.52753	285.752	13.0799	37.9868	31.7228	23.7399	197.741	50.6779	43.7502	437.255	2.51661	52.1664
NCI-H1299	6	90.7914	235.852	668.686	178.134	307.997	221.164	187.592	2857.34	323.454	107.612	75.2811	3.68556	5.96518	160.25	612.892	71.6293	188.844	1.47238	76.326	28.0098	10.9649	12.3976	53.806	7.54983	4	0.866025	38.448	4.3589	1.1547	9.64797	31.277	21.0178	85.629	7.76209	8.28151	25	3.05505	185.893	5.03322	16.0416	11.0151	114.823	58.0259	55.1203	33.7095	104.082	4.6188	14.5717
NCI-H1299	8	174.931	238.914	225.757	57.3723	513.095	121.738	13.8233	307.752	50.7149	59.0134	4.53689	1.52753	2.08167	17.8979	16.5756	26.182	204.909	5.13376	59.1798	14.5703	9.57269	23.0068	12.0035	6.65833	4.92443	3.21455	67.2241	5.50757	2.08167	11.8989	91.682	23.824	114.963	6.71441	7.57188	11.0151	1.52753	33.1675	3.1225	3.61709	20.7023	89.3145	86.3776	121.445	44.6019	130.342	2.29129	17.7764
NCI-H1299	12	77.2404	231.605	251.54	63.8931	101.491	21.3854	11.6512	478.552	76.0203	142.581	81.4079	11.8779	9.29157	53.612	58.0029	49.9892	162.367	0.88984	44.7682	12.099	5.51181	19.0143	140.894	2.02073	3.51188	0.866025	61.1991	2.78388	2.92973	4.53689	59.2312	18.8702	147.967	9.64365	9	47.4087	0.57735	239.366	16.5856	58.2866	31.2663	17.5855	37.1629	75.1249	37.1629	368.124	4.04145	131.538
NCI-H1299	16	96.4292	443.06	114.07	28.8444	200.828	33.8391	21.6333	581.165	214.255	88.7849	38.6825	6.21155	3.88373	60.3372	84.1818	73.168	185.557	5.10136	33.8433	42.4747	14.4901	38.8985	63.6108	7.2111	2	4.64579	67.8497	2.75379	2.64575	12.1655	124.034	10.2754	98.1508	1.32288	7.23418	45.6399	2.64575	154.403	7.00595	25.5408	57.7906	11.8779	74.4468	37.2693	17.2988	383.276	0.57735	27.7594
NCI-H1299	20	155.885	586.904	469.119	50.765	204.42	55.0371	39.3393	208.382	199.555	112.451	9.84886	2.84312	1.60728	62.963	35.019	62.9199	385.273	1.56953	98.7896	40.6983	16.3063	39.1338	88.6656	3.51188	1	3.5473	29.904	2.3094	5.00833	3.05505	116.414	20.8107	210.21	10.9125	10.4083	27.7549	4.93288	158.692	15.0028	17	26.2218	28.8054	27.9702	33.2127	28.5934	95.9744	8.88819	59.3492
NCI-H1299	24	30.4467	359.354	350.702	2.25462	597.449	5.79511	48.7963	399.267	263.627	29.6873	67.5962	7.18215	2.88675	66.3425	38.7115	11.3471	188.706	6.78032	51.5339	5.69023	7.74741	9.58999	72.7759	4.0104	5.50757	4.72582	20.2073	4.50925	1.04083	4.25245	82.3514	43.0997	134.215	10.2632	9.29157	10.3722	0.57735	48.1984	3.75278	4.58258	33.6204	37.7227	37.1966	26.1024	7.46659	236.324	3.78594	25.5147
NCI-H1299	36	256.72	964.349	200.829	123.598	778.638	11.8779	24.0208	393.745	404.369	85.3654	100.926	3.32916	4.6188	47.6191	196.122	10.8669	306.817	3.83427	61.2028	17.5232	1.05779	16.8234	79.8817	2.51661	1	3.05505	34.3038	1	5	9.26013	43.9204	83.4825	195.74	10.2997	31.8604	14.6316	1.52753	19.8578	2.3094	10.116	19.1572	97.0365	35.7783	29.7923	41.0163	238.384	3.05505	61.8392
NCI-H1299	48	21.0792	666.953	72.2311	111.634	406.643	60.5028	37.018	151.394	333.187	176.438	104.862	12.6623	3.96863	45.5915	191.723	348.67	1198.46	28.9242	237.351	148.019	58.0456	102.414	860.789	12.5033	3.04138	28.1484	63.1691	5.29937	5.56776	11.7934	369.197	165.441	212.605	10.9697	32.0052	244.689	2.08167	179.552	17.0392	43.6616	34.6708	21.3195	96.7592	23.6714	28.7362	131.76	6.21155	21.8575
NCI-H1299	72	164.616	878.706	302.954	75.005	600.03	99.3382	95.1056	184.173	190.726	121.847	150.039	34.2162	2.08167	36.6788	54.0093	174.545	966.189	16.5388	35.8173	105.283	51.67	73.4365	505.084	0.763763	1.52753	9.29157	24.5561	5.03322	0.763763	5.50757	240.033	549.668	166.75	6.25167	10.6927	171.323	1.52753	101.533	21.5426	24.4404	26.7313	4.7697	6.71441	78.8517	5.65133	52.2831	2.08167	39.95
NCI-H1573	0	140.001	828.704	46.1709	21.5658	92.6517	74.031	51.0131	255.444	56.7186	13.8924	41.068	11.5578	81.4637	61.707	30.3987	7.6312	587.527	15.7754	51.3767	31.7323	1838.07	32.4634	58.1406	7.05337	6.55744	2.78388	186.093	11.5326	181.511	4.4441	368.587	10	23.3041	9.12414	6.245	15.7162	0.57735	197.13	9.22406	5.50757	60.7707	74.1401	64.5523	24.5578	37.4032	792.254	1.73205	1.04083
NCI-H1573	2	82.5242	603.566	61.1767	54.0031	241.592	44.318	59.3661	429.81	22.0473	39.0864	11.6297	8.00521	414.764	123.204	21.5078	24.0542	507.759	12.4369	73.5554	16.4102	2663.54	26.426	128.71	16.6007	9.53939	5.00833	190.537	28.931	369.063	3.05505	363.241	12.4532	38.0307	2.64575	0.763763	6.08276	0.57735	101.982	2.64575	1.73205	65.5057	34.2576	17.2651	96.5004	24.6644	627.733	1.25831	1.52753
NCI-H1573	4	158.27	123.77	378.12	73.3661	397.086	47.3665	228.461	591.536	101.393	24.7437	13.2035	4.58258	439.096	135.806	69.7358	59.458	938.667	0.771994	185.587	21.0456	486.152	4.83653	50.2693	4.3589	4	2.59808	606.775	3	560.571	14.7564	165.973	7.37111	24.5017	3.05505	1.52753	24.0069	1.32288	315.747	3.5	14.4655	41.7143	130.048	29.0359	38.0274	4.25245	241.011	3.05505	7.42181
NCI-H1573	6	369.221	674.62	234.509	31.7857	258.826	182.883	61.7117	195.014	6.75154	4.7697	9.07377	1.52753	146.505	27.5379	21.6814	50.9292	815.668	13.6735	131.044	28.5022	1379.65	31.388	66.1992	8.14453	3.60555	3.81881	487.549	10.504	852.17	6.76387	454.964	18.5562	14.9332	2.51661	2.3094	4.92443	0.57735	137.03	4.3589	5.56776	7.50555	81.9085	25.1595	156.704	13.6961	239.996	3.60555	7.0946
NCI-H1573	8	314.954	498.458	331.869	36.7503	216.181	154.286	150.984	290.48	27.5379	87.7097	6	4.04145	113.561	47.543	49.1384	31.0889	1212.42	0.385997	132.637	20.2959	3901.09	17.4054	104.306	33.3879	16.6458	6.65833	1390.65	33.7873	1070.16	44.4307	618.619	3.78594	61.1412	1.25831	2.08167	11.5326	2	150.533	3.21455	6	33.3654	336.895	18.9099	287.11	13.2696	248.581	2.3094	3
NCI-H1573	12	87.7268	572.566	104.907	24.2848	88.7074	41.8599	61.4898	917.858	23.0072	86.153	11.0567	7.02377	313.256	32.4191	41.1461	37.3632	81.5879	3.50143	78.8918	22.7593	1711.36	7.9602	90.7749	1.04083	2.64575	2.08167	526.426	8.544	1505.72	5.79511	175.132	13.8684	21.531	1	3.68556	14.7422	0.288675	237.619	5.10718	7.52219	29.7588	89.751	27.7308	45.3569	22.0586	195.996	2.08167	4.09268
NCI-H1573	16	209.473	532.589	69.8039	22.2205	316.63	72.0179	165.083	1522.93	54.2732	109.328	18.6167	7.36546	304.356	60.0583	10.5987	45.532	692.196	4.97108	204.333	39.1809	1000.76	10.7931	13.2035	10.9697	3.60555	2.3094	432.3	4.3589	463.023	44.5037	66.4423	22.3681	39.0384	3.21455	2.75379	29.3995	1.1547	172.792	3.78594	10.4043	75.8326	309.132	78.9325	93.0072	30.6649	874.823	7.36546	10.4203
NCI-H1573	20	898.804	511.226	151.203	74.2765	365.465	256.105	228.026	1244.31	20.0395	47.3471	3.51188	8.544	177.116	24.0278	5.50757	53.7576	626.059	15.5628	226.551	37.9984	6078.13	28.0585	51.2274	7.93725	6.08276	4.50925	409.785	8.5049	2050.87	6.9282	407.164	10.6888	26.0208	2.64575	4.6188	19.3132	4.04145	201.14	8.12917	13.5769	13.3167	26.3122	9.25113	53.5545	4	307.038	3.51188	12.7574
NCI-H1573	24	360.073	366.019	103.66	27.1539	159.691	64.4851	83.8093	221.936	50.1107	110.885	28.2504	11.1505	662.319	61.3297	9.41187	22.1118	891.336	3.72528	110.559	33.1909	308.091	40.5591	5.50757	4.53689	2.51661	2.51661	201.196	2.08167	239.412	30.791	150.268	9.5	48.7553	1.1547	0.5	42.9108	2.88675	349.042	14.936	15.0444	6.21155	282.626	8.67468	63.7423	4.93288	217.518	3.05505	6.33114
NCI-H1573	36	228.531	229.947	262.877	47.0611	403.383	204.282	227.016	1859.87	21.362	146.466	10.6927	1.04083	195.25	44.5459	4.58258	40.2165	358.936	3.03584	236.446	15.0737	3817.79	18.4905	13.5769	4.53689	0	2.75379	205.218	0.866025	1484.7	10.1489	240.001	24.4762	30.8801	3.40343	2.64575	8.73689	1.1547	48.645	1	3.75278	37.027	55.3444	107.612	24.6086	22.2505	674.799	2.51661	5.85947
NCI-H1573	48	177.734	1473.09	153.02	35.2467	144.208	90.9986	264.443	1069.46	32.2348	89.9393	37.8726	7.50555	753.629	20.2258	5.5	59.4451	437.589	21.1031	161.556	62.9418	11255.4	48.9034	52.6245	10.504	6	5.3929	479.43	8.32666	3090.6	13.1561	387.728	17.8629	19.564	0.866025	1	33.2616	2	145.498	8.46069	10.4762	20.1018	67.545	4.72582	28.1484	12.5532	291.604	2.75379	3.5473
NCI-H1573	72	302.494	1997.78	80.0021	40.7308	386.364	257.606	110.167	657.05	50.1007	35.3836	43.1393	5.50757	342.955	76.3288	317.953	32.3853	270.042	10.8079	177.854	13.3387	18.2524	7.02108	98.5829	22.9986	14.7422	12.3423	282.447	10.6888	1749.41	18.5831	498.96	25.5408	123.077	6.08276	3.90512	22.942	1.73205	34.7035	8.73689	6	24.5611	1050.36	32.9254	97.0966	9.46485	346.168	6.35085	16.0026
NCI-H1975	0	202.01	271.199	162.73	25.0416	495.561	80.1083	195.642	767.846	67.6782	2.46644	9.45163	2.5658	157.613	44.616	438.434	11.3578	66.5056	1.73205	113.618	5.26783	195.125	1.80278	13.5031	12	8.73689	2.88675	63.3173	19.1072	435.618	14.7422	159.425	2.29129	90.863	0.57735	0.57735	7.42181	1.1547	119.608	2.02073	7.93725	14.4684	40.9095	23.4858	138.601	14.7564	146.369	1.52753	15.543
NCI-H1975	2	38.4751	302.082	205.928	53.7502	314.494	60.0999	182.847	541.718	23.6432	9.84886	5.34634	0.57735	359.424	12.0139	155.646	18.8215	197.108	2.08167	16.9214	3.60555	66.8849	1.52753	8.04674	7.23418	1.52753	5.56776	101.933	8.4113	1284.24	10.8167	424.775	2.46644	30.3081	5.50757	1.1547	14.7986	1.1547	320.615	5.50757	19.6299	27.0386	12.49	35.5949	48.3503	28.2135	170.571	2.08167	4.25245
NCI-H1975	4	479.116	273.741	130.369	78.8104	880.339	80.9264	378.622	714.01	118.314	13.0128	16.6158	1.32288	325.157	44.9704	805.9	14.5459	135.537	1.1547	26.2409	5.20416	229.238	0.57735	31.1889	44.7186	12.6787	14.5717	666.473	23.029	3665.25	58.2266	669.088	5.85947	203.227	5.2915	2.92973	29.8594	0.57735	380.403	5.50757	31.2823	23.7329	101.707	180.31	56.4365	39.5	284.404	0.763763	46.5143
NCI-H1975	6	362.609	346.226	88.2597	85.7049	822.28	192.27	191.076	642.132	183.742	1.73205	22.198	5.2915	467.872	93.8247	241.355	10.9697	248.749	1.1547	104.557	4.7697	324.576	2.02073	10.2632	15.3948	2.51661	3.4641	103.523	4.272	162.904	25.2603	212.505	3.51188	104.352	5.50757	2.02073	30.4467	10.4083	406.633	7.54983	25.181	25.1197	120.355	46.8482	563.732	14.1804	164.057	3.32916	17.088
NCI-H1975	8	268.144	30.5505	336.767	76.3501	964.882	13.7871	359.732	633.12	33.6687	16.1967	17.9258	9	398.406	67.0976	511.271	19.7632	130.202	0.57735	81.4616	4.4441	87.0618	1.25831	6.02771	4.04145	3.21455	6.65833	24.7857	7.46659	412.888	5.3929	134.552	9.1697	28.2194	2.3094	2.25462	12.5831	1.1547	155.621	1.75594	12.4231	10.681	22.0019	32.5359	116.899	11.5902	136.564	1	21.0317
NCI-H1975	12	136.504	178.309	315.537	42.5039	893.808	17.1343	409.917	499.844	171.016	8.7178	2.75379	2.3094	189.613	31.3488	806.562	13.5923	65.6779	4.04145	43.9631	10.0042	177.865	3.21455	28.1839	6.00694	5.1316	4.3589	38.6749	9.16515	402.744	8.83648	167.162	2.84312	123.305	1.52753	1.52753	21.168	1.52753	274.826	6.65833	17.3494	73.5	52.9646	245.702	147.347	65.3726	689.389	2.08167	18.0716
NCI-H1975	16	123.122	441.403	104.261	48.822	791.785	39.4726	418.283	56.1256	242.761	24.5425	30.3535	4.04145	425.761	82.1645	195.154	18.2369	72.686	1.1547	45.3054	4.72582	493.2	3.60555	42.27	33.7194	3.05505	3.21455	217.505	4.3589	501.046	24.1937	412.52	5.1316	10.8282	3.2532	2.64575	5.50757	3.21455	97.278	1.52753	5.7735	16.4418	136.676	28.9065	104.056	6.44851	231.992	1.1547	2.17945
NCI-H1975	20	201.843	403.711	108.845	95.8519	1012.1	115.506	370.515	153.088	85.0152	34.9476	48.8987	19.4186	169.961	32.7274	193.5	13	82.9643	1.52753	67.2012	6.1101	336.673	1.75594	32.405	17.673	0.5	5.34634	170.472	6	1013.05	15.5885	234.535	10.5159	147.461	2.84312	3.5473	10.6927	2.3094	88.5042	1.52753	7.39932	16.4621	271.761	110.336	294.973	17.3205	243.955	0.57735	27.2626
NCI-H1975	24	530.295	572.419	333.504	400.229	2209.22	167.022	1182.18	974.464	131.985	29.0646	8.76071	1.60728	118.22	18.8768	417.76	7.36546	39.4113	0.763763	24.116	2.08167	1027.12	2.3094	62.4206	24.9349	6.08276	9.41187	174.545	21.6391	2770.26	22.5019	382.702	2.08167	128.091	5.34634	2.75379	19.7885	3	124.557	1.1547	12.897	27.1216	206.846	26.1454	28.7851	13.8564	223.421	3.78594	6.80686
NCI-H1975	36	744.005	281.555	206.771	169.777	703.568	26.8995	177.117	532.241	742.582	34.0735	87.8725	27.2213	2187.58	308.393	2106.31	27.3907	15.1438	2.08167	81.5598	3.60555	579.196	1.52753	40.3867	17.6517	5.50757	4.272	153.632	1.52753	1634.28	18.9934	545.126	5.56776	202.33	5.34634	7.54983	22.7834	0.57735	55.5068	4.50925	4.72582	22.2542	148.075	34.1431	182.078	8.32666	176.134	1.1547	6.1101
NCI-H1975	48	487.459	667.907	63.2218	71.2466	1499.23	90.3867	349.152	1039.29	152.058	7.26292	44.886	4.3589	362.196	33.7429	226.33	44.2305	12.5831	2.51661	69.2122	7.0946	1372.41	4.72582	71.071	14.3643	12.1655	8.43109	82.5838	23.516	1238.99	17.5523	209.511	6.87386	330.302	8.67468	2.29129	24.7201	2.08167	123.699	1.25831	4.93288	68.2575	38.1576	58.1578	64.6265	6.50641	194.431	2.3094	13.6137
NCI-H1975	72	455.437	1411.96	216.25	52.634	1336.35	74.8549	582.331	289.16	114.286	14.1067	71.7815	1.75594	323.738	29.3655	456.577	69.1741	88.6853	1.87639	18.1986	2.92973	589.736	6.25167	135.183	8.60717	3.60555	19.7547	55.9606	8.32666	950.646	10.0374	399.178	21.2975	117.901	5.1316	2.5	21.3776	0.57735	146.479	5.85947	5.56776	273.589	42.7561	77.565	145.08	9.53939	1624.69	3.60555	3.05505
SW-1573	0	185.308	19.2159	191.774	214.78	116.282	51.9262	131.439	428.912	66.4605	5.68624	6.245	38.397	234.031	327.222	1167.54	9.50438	45.5988	4.04145	10.5357	10.2632	153.513	5.34634	43.7617	5.75181	1.73205	3	55.9933	4.4441	13.7568	3.04138	104.862	4.93288	3.51188	1.52753	7.63763	2.08167	2.51661	519.959	6.94622	4	17.4356	98.287	21.5019	38.1357	5.2915	1.25831	3.40343	52.7739
SW-1573	2	78.3332	48.3813	186.203	98.3018	134.277	35.9212	163.849	1686.73	152.717	70.9935	10.2754	23.2289	426.997	639.252	1592.55	44.0085	34.2527	3.68556	31.4815	6.65833	231.229	5.50757	104.886	7.37111	12.5033	4.6188	36.4086	11.5902	36.0555	10.251	79.5047	4.16333	119.607	0	4	6.1101	3.51188	82.0325	7.23418	3.5473	13.6504	146.702	30.4015	62.2582	23.803	3.21455	1.52753	113.089
SW-1573	4	69.7639	71.4394	269.847	94.8187	67.6061	43.6358	81.77	175.526	39.3107	43.7302	10.1283	6.76387	242.202	293.542	610.482	65.2999	57.2589	2.64575	35.6382	3.51188	242.102	5.89491	30.4357	5.68624	2.46644	6.44851	32.6241	5.25198	53.9846	4.50925	28.941	2.64575	192.182	1.52753	6.65833	2.5658	1.73205	227.374	3.4641	1	35.0749	39.4049	26.8468	37.6597	28.1203	6.55744	15.1327	151.526
SW-1573	6	660.026	25.1942	366.451	204.811	124.015	31.4285	74.0428	426.663	141.231	36.2951	12.3423	9.67385	767.294	514.395	2237.15	10.8167	26.8344	4.19325	50.5973	5.96518	230.747	4.6188	38.553	3.75278	1.25831	0.57735	72.2513	5.19615	94.648	3.21455	91.7692	0.57735	86.3255	2.64575	5.76628	6.1101	3.05505	68.3855	6.65833	3.21455	24.5425	235.95	26.741	79.7125	30.9892	3.04138	0.866025	20.9782
SW-1573	8	537.76	86.3052	88.7642	37.1719	102.609	43.8444	8.89288	985.027	86.7583	15.185	14.7309	3	954.739	551.523	2475.72	38.487	65.1178	2.08167	75.1604	3.78594	305.287	2.02073	10.6927	4.04145	1.52753	2.92973	62.0826	5.03322	210.9	2.51661	104.032	4.6188	186.904	1	2.88675	5.68624	2.51661	581.148	5.1316	9.16515	23.7539	123.37	21.3327	193.436	24.6796	3.05505	4.48144	79.4927
SW-1573	12	251.35	17.2506	328.488	65.5922	68.2862	59.3661	106.888	491.01	52.0865	38.175	3.2532	2	302.842	119.21	1082.85	27.5515	12.829	2.64575	17.3277	6.78847	316.425	2	44.859	5.56776	2.08167	3.78594	56.0007	1	99.5038	1	36.1156	8.94893	96.128	2.51661	3.2532	3.51188	3.21455	478.235	5.68624	5	9.60902	56.09	5	79.0759	7.02377	0.763763	5.85947	54.4204
SW-1573	16	37.9287	41.504	345.73	76.0663	88.7839	49.4874	97.0773	206.545	47.648	48.6886	15.1767	11.1841	1527.97	360.396	2379.43	169.815	86.7583	1.1547	93.5962	5	601.365	5.22015	56.3471	8.0829	5	6.52559	74.3421	8.5049	339.959	4.3589	65.0641	5.56776	113.846	1	3.78594	7.54983	4.3589	1025.93	25.6953	3.05505	40.8667	294.57	36.2365	292.371	67.8546	14	6.245	211.567
SW-1573	20	393.892	134.97	445.349	44.5234	81.9059	40.7717	87.992	716.316	61.8796	38.5919	4.33013	4.7697	755.483	384.984	436.237	146.251	57.8619	1.80278	138.291	4.16333	909.27	3.5	109.278	8.02081	4.58258	17.0612	84.0035	1.52753	1127.29	4.4441	95.212	2.3094	258.91	1	6.9282	8.544	4	356.38	9.3586	3.68556	54.1995	53.2893	17.0978	457.564	41.9553	6.29153	2.51661	253.957
SW-1573	24	289.389	83.008	165.881	30.8261	26.839	31.4762	57.9662	1101.07	37.9287	77.8026	11.0151	2.08167	901.807	230.181	907.589	134.819	53.4657	2.75379	76.2173	8.54888	704.248	4.04145	52.6522	3.05505	1.32288	23.9496	13.8774	4.3589	334.687	5.00833	29.3442	6.80686	200.904	2.64575	6.245	3.68556	3.4641	460.377	5.19615	2.51661	15.7507	105.453	11.2583	229.759	47	6.35085	2.64575	186.776
SW-1573	36	359.147	81.7532	220.171	158.941	102.697	34.2308	118.102	853.751	64.9333	47.0009	6.78847	6.78847	1288.34	363.253	1550.71	156.897	24.3875	3.5	58.2888	13.3167	204.72	4.4441	13.5308	4.92443	20.4104	33.1512	130.715	3.05505	961.391	10.116	171.191	101.772	205.159	2.08167	1	11.1505	1.52753	469.385	3	8.66025	26.2742	136.732	20.5933	263.752	38.6792	9.16515	4.3589	137.137
SW-1573	48	754.987	211.795	215.875	105.84	185.004	90.649	90.6035	480.09	12.6919	27.1861	10.8666	6.245	230.934	80.6014	106.726	32.3161	3.90512	0.57735	52.4222	2.92973	104.322	2.75379	130.024	1.52753	3.68556	20.9841	53.7773	3.51188	387.876	5.68624	102.114	223.391	113.421	0.57735	3.75278	3.78594	5.1316	209.975	5.1316	1.73205	10.751	60.6348	14.5688	355.816	11	2.64575	1.04083	129.991
SW-1573	72	300.2	12.2202	144.137	62.8616	341.958	60.1692	271.532	903.235	71.1056	9.5	16.9779	4.50925	545.023	285.002	1902.76	97.5436	34.8473	1	34.2503	12.9325	8076.21	5.96518	366.836	2.5658	1.52753	29.0388	132.296	4.04145	1122.93	8.22091	157.721	206.925	275.62	3.32916	8.89288	10.7587	3.78594	572.838	9.71253	6.4291	24.271	428.254	14.6487	86.7122	6.38357	4.93288	1.60728	40.5925
[truncated: 5 more columns]

## Sheet: Normalised to median
Cell line	Time	ATR (Total)	Chk1 (Ser345)	Chk2 (Thr68)	P53 (Total)	P53 (Ser15)	p53 (Ser46)	MDM2 (Total)	p21 (Total)	H2A.X (Ser139)	Cleaved PARP	IRS-1 (Ser636/639)	Akt (Ser473)	BAD (Ser136)	BAD (Ser112)	Bcl-2 (Ser70)	GSK-3α/β (Ser21/9)	S6 ribosomal protein (Ser235/236)	PTEN (Ser380)	mTOR (Ser2448)	P70S6K (Thr389)	MEK1 (Ser217/221)	ERK1/2 (Thr202/Tyr204)	P90RSK (Ser380)	P38 (Thr180/Tyr182)	HSP27 (Ser78)	JNK (Thr183/Tyr185)	c-Jun (Ser63)	ATF2 (Thr71)	STAT1 (Tyr701)	STAT3 Ser727 (52)	TGFβRII (Total)	Smad2 (Ser465/467)	Smad3 (Ser423/425)	Smad4 (Total)	NF-κB (Ser536)	IκBα (Ser32/36)	BAD (Total)	Bcl-xL (Total)	BIM (Total)	MCL-1 (Total)	Bcl-xL/BAK Dimer (Total)	MCL-1/BAK Dimer (Total)	BAX/Bcl-2 Dimer (Total)	Survivin (Total)	Active Caspase-8	Active Caspase-9	Active Caspase 3
A549	0	759.236	78.8611	41.8611	91	23.4167	677.407	1222.14	6944.35	64.3333	442.167	588.5	1842.28	845.222	489.086	19.5091	8607.83	15134.1	2607.56	1555.72	1121.11	5031.31	68.9583	7.16667	89.1667	55.5	36.9688	125.806	17.9722	37.3611	2480.83	707.028	423.667	55.6667	3773.97	181.333	650.639	49.6111	9260.89	67.9444	85.6389	1376.03	27.7222	11.9722	23.6667	15.5716	349.423	89.8611
A549	2	654.069	496.528	116.694	128.5	48.9167	1082.74	1220.14	6483.85	73.6667	518	777.833	5775.44	700.722	969.253	19.1757	10850	14694.4	2518.39	1371.22	1193.94	6118.97	370.958	10	88.6667	54.5	57.4688	87.3056	42.3056	23.3611	2771.5	724.861	504	67.3333	3636.64	96.3333	350.806	52.9444	9031.22	65.2778	104.306	1295.19	33.0556	12.1389	24.8333	21.905	299.256	69.0278
A549	4	657.569	283.528	149.194	152	164.917	2260.57	1321.97	7144.35	68.6667	470.167	621.833	8677.28	812.889	1121.75	23.6757	11862.5	15976.9	2438.39	1480.39	1142.78	6651.47	895.625	17.8333	92.6667	54.6667	60.6355	47.3056	36.6389	10.8611	3843.67	626.361	697	105.5	4000.14	83	349.806	54.7778	9494.56	56.7778	108.306	1346.69	32.0556	15.4722	29	31.5716	331.089	65.3611
A549	6	629.903	340.194	201.694	144.833	271.75	3854.07	2366.47	9536.85	64.3333	764	588.333	6308.61	1060.72	1102.25	23.1757	11302.5	15424.4	2389.89	1472.39	1139.28	4584.81	526.625	14.6667	89.8333	55.6667	77.3022	131.472	27.9722	32.5278	3558.67	559.528	506.333	115.333	4324.31	153.333	563.806	48.1111	9212.22	45.6111	100.972	1386.36	24.5556	9.13889	30.3333	27.0716	339.423	55.3611
A549	8	622.569	446.361	187.694	136.667	280.25	3301.74	2655.81	10853.5	66.8333	775.167	602.5	5291.78	773.056	837.42	20.0091	11219.2	14445.9	2587.39	1344.39	1182.61	4518.47	526.792	12.3333	90.6667	57	96.1355	61.6389	33.4722	16.3611	3523.67	521.361	408.167	85.5	4497.31	79	243.472	52.9444	9352.89	49.1111	103.639	1404.69	25.7222	11.1389	35	21.905	290.423	49.5278
A549	12	699.903	584.861	204.528	202.667	628.917	5693.07	3166.64	14509.5	60	624.167	609.167	8506.78	890.389	893.42	24.3424	10987.5	14826.2	2682.22	1499.56	1245.94	4611.97	498.292	13.6667	87.5	51.6667	107.135	72.6389	63.8056	11.1944	4187.33	701.194	384	75.8333	4916.97	75.8333	245.139	60.2778	10257.6	49.2778	112.306	1693.69	27.5556	13.8056	43	27.905	318.589	52.6944
A549	16	1151.24	866.028	293.528	433.667	2352.25	9138.41	4877.31	18576.7	69.3333	659.5	625.833	12040.6	907.222	816.253	17.0091	11859.7	15505.2	2859.72	1767.72	1381.78	4365.81	670.292	16.3333	96	58.3333	172.302	33.4722	97.1389	12.1944	5891.83	755.361	231	25	5253.64	84.1667	288.639	72.2778	9730.72	29.2778	109.306	2248.19	47.0556	10.4722	39.3333	19.7383	266.256	54.3611
A549	20	1301.07	1032.36	362.194	784.167	3829.58	10997.4	6035.81	23625.3	67.3333	714	544	12270.8	1608.06	792.42	18.1757	11448.2	16133.2	3322.72	1707.39	1414.44	4715.81	391.792	18.3333	97.1667	60.3333	124.635	21.3056	70.4722	12.8611	7200.33	831.194	226.833	47.3333	5434.97	85.6667	272.306	80.9444	10982.4	34.6111	120.139	1927.19	36.0556	9.13889	37.6667	17.405	277.089	58.0278
A549	24	1105.07	651.194	339.861	481.667	1120.75	10341.4	5225.97	26626.3	70	406.167	388.167	10219.1	1581.39	788.586	17.0091	10606.7	14602.4	2657.39	1248.06	1182.61	1769.47	512.958	7.66667	84.6667	53	126.135	35.6389	1	10.1944	4420.17	975.194	232.667	50	5634.47	121.667	496.806	76.6111	10330.9	27.2778	98.6389	1847.03	37.0556	7.97222	38.5	12.905	309.256	58.0278
A549	36	982.903	264.361	303.528	211.667	618.25	7681.24	4070.47	31201.7	63.1667	569.333	397.833	8763.78	1409.22	762.92	12.6757	10003.3	15342.6	3270.22	1461.06	1280.44	2039.81	308.625	8	87.3333	50.6667	134.135	13.3056	10.8056	7.19444	5401.67	1241.36	180.5	31.1667	5217.47	80.5	256.472	77.6111	10958.7	28.1111	94.6389	1603.53	34.3889	9.13889	27.8333	13.5716	389.589	62.0278
A549	48	1058.4	85.8611	408.861	207.833	1065.92	7390.74	4299.31	32489.8	64	300.5	351	9689.78	1994.06	535.753	9.17574	9703.17	12852.7	4406.56	1875.39	1417.61	1421.64	208.792	7.66667	90.6667	53.1667	126.302	5.97222	74.8056	8.69444	5733.67	1583.19	222.333	60	5989.31	72.6667	236.306	110.944	12061.6	26.9444	123.472	2284.19	47.8889	9.47222	25.3333	10.5716	629.756	52.6944
A549	72	809.236	45.1944	392.194	108	1367.25	5137.24	3981.81	32334.2	59.6667	563	294.5	6615.11	1966.39	328.42	10.6757	9256	11156.7	4662.06	1704.89	1110.94	1666.31	118.792	8.33333	104	52.8333	183.802	22.6389	273.639	15.5278	7383.67	1676.03	171.833	78.3333	5119.81	110	425.806	88.4444	11623.6	27.2778	74.3056	3023.19	54.0556	10.4722	23.3333	7.90496	716.756	61.6944
NCI-H358	0	344.403	35.8611	45.8611	60	2.91667	47.7404	90.3056	2870.51	19.3333	607.5	359.167	619.278	1421.39	1331.75	16.6757	4689.67	4115.22	1134.56	2529.06	1704.61	2170.31	186.792	388	106.667	48.3333	102.802	140.806	1	37.8611	589.667	291.194	113	235	3491.14	111.667	403.139	59.6111	4565.22	98.9444	158.639	1400.36	41.7222	11.1389	16.3333	17.405	72.4226	70.1944
NCI-H358	2	370.569	512.028	66.6944	42.3333	1.58333	43.4071	116.139	3203.85	35.3333	617.5	563.667	297.944	525.056	2039.59	16.3424	4036.58	3207.64	1216.72	2898.56	2015.11	3132.47	185.958	355	113.667	51.8333	301.802	421.806	65.4722	28.1944	1272.67	307.194	124.833	165.5	3805.81	97.6667	468.306	53.6111	4380.56	89.4444	193.306	1012.53	49.0556	15.4722	19	15.5716	71.9226	58.6944
NCI-H358	4	435.236	362.194	116.528	26.6667	1	32.0737	248.972	2856.01	42	489.5	469.333	725.778	802.389	2138.42	10.0091	5468	5775.72	1238.39	2579.39	2349.11	2119.81	701.125	560.333	109	53.3333	282.802	154.139	2.47222	16.0278	1721	309.528	124.333	174.667	3889.31	85.5	314.139	60.9444	4607.22	79.2778	221.972	1184.36	54.2222	9.13889	18.6667	10.0716	64.7559	77.5278
NCI-H358	6	363.403	210.194	130.194	44.1667	1.25	46.7404	214.306	2533.35	39	741.5	496.5	1251.94	1014.39	2144.75	13.3424	5400	5588.39	1404.22	2894.72	2489.28	2910.81	574.458	568.333	109	50	173.302	165.306	1	24.8611	1795	292.694	119.333	202	4230.64	104.333	365.972	87.9444	5470.72	92.6111	257.472	1831.36	55.0556	9.30556	23.6667	17.5716	86.0893	75.8611
NCI-H358	8	452.903	307.194	180.028	62.8333	1.58333	46.7404	395.472	3987.68	51.3333	416.333	441.167	1002.44	914.056	2028.59	17.0091	5479.17	6051.56	1428.06	2794.22	2468.11	2463.14	442.125	453.75	100.167	45.5	165.469	122.306	1	21.5278	1418.25	294.028	93.6667	184.333	4006.14	96.8333	336.139	81.6111	5313.06	88.4444	217.639	1362.19	46.8889	11.4722	22.1667	19.7383	84.5893	67.0278
NCI-H358	12	635.569	528.861	173.361	55.3333	3.41667	73.4071	480.472	3260.51	45	872.333	422.5	1248.69	861.556	1998.59	27.3424	5030.58	7515.06	1213.39	2310.72	2173.78	3481.64	264.458	449.667	110	50.1667	134.635	133.806	17.4722	25.1944	1874.17	389.194	83.3333	183.667	4347.47	96.3333	319.472	104.278	5846.56	122.111	257.639	1932.36	61.7222	12.3056	31.6667	34.7383	110.923	66.8611
NCI-H358	16	767.236	412.028	186.861	44.1667	0.583333	85.9071	517.472	3082.01	42.6667	651.833	398.917	811.944	1673.89	2204.75	28.6757	3213.83	5874.06	1230.22	2337.72	2246.86	2092.97	276.792	554.167	96.8333	47.6667	266.802	151.472	19.4722	33.3611	1863.17	467.861	101.5	155.667	4586.31	106.667	243.639	123.611	5321.72	125.278	243.306	1510.69	67.7222	14.1389	32.5	39.5716	103.423	64.1944
NCI-H358	20	815.569	685.694	257.361	41.1667	6.58333	57.0737	572.139	4107.35	53	396.5	502	1077.53	1413.81	1857.75	17.8424	4250.25	6267.56	1227.47	1715.72	2326.19	2633.97	491.958	498.333	109.333	53.6667	303.302	146.972	23.6389	27.1944	2182.33	455.694	84.5	140.833	4539.64	109.833	287.472	133.278	5394.89	129.611	264.972	1292.19	65.3889	14.8056	32	27.0716	87.4226	56.6944
NCI-H358	24	677.069	552.861	191.528	37.1667	2.25	114.74	364.306	1803.68	28.3333	328.667	510.333	1345.94	1090.39	2012.75	30.5091	4718.5	6622.72	1244.72	2793.22	2432.78	3012.31	354.458	517.167	106.333	47.3333	217.802	139.472	45.3056	29.6944	2292.67	456.528	62.8333	116	4336.81	107	241.472	120.278	5053.56	116.278	240.972	1920.69	67.2222	12.1389	35.1667	45.2383	112.423	87.5278
NCI-H358	36	881.569	409.194	264.528	58.1667	5.25	143.24	574.472	5635.01	44.5	557.333	584.833	1757.11	1526.56	2209.75	34.3424	4679.5	6186.56	1379.39	2732.56	2550.78	4211.14	667.125	636.167	109.333	50.6667	224.969	88.8056	15.1389	26.5278	2825.17	593.528	100.167	153.333	5067.64	102.167	197.472	127.611	5349.39	124.778	275.306	2220.86	82.0556	9.47222	46.6667	62.5716	143.589	65.0278
NCI-H358	48	1313.74	496.528	349.528	34.6667	3.91667	66.0737	685.472	13336.7	47.8333	231.667	605.833	1304.11	1859.56	1080.42	25.3424	4162.33	5686.89	1392.22	2484.56	1922.61	2256.47	233.625	343.667	103	51.6667	293.302	135.639	5.80556	38.5278	1899.67	559.028	62.8333	126.5	5003.14	123	174.639	171.278	4493.39	120.778	248.306	2150.36	73.3889	8.80556	52.6667	24.2383	91.0893	57.6944
NCI-H358	72	977.403	242.861	449.028	67.6667	12.5833	49.7404	650.639	17854.2	55.1667	204.667	429.5	1159.61	2677.22	1952.09	17.1757	3598.17	5062.72	1402.06	2440.22	1181.44	2677.14	126.292	348	118	55.6667	308.969	109.972	60.9722	50.0278	1901	535.694	38.6667	98.3333	5349.47	130.833	203.306	252.611	4233.89	91.9444	174.639	3728.03	79.5556	6.13889	48.3333	22.7383	128.089	94.3611
NCI-H1299	0	1260.24	104.194	103.361	67.6667	2.91667	23.7661	207.806	748.514	47.8333	91.5	460.833	408.444	1888.06	351.406	12.3764	6527.17	3627.39	945.056	2340.06	905.111	71.6389	1	48.1667	97.3333	53.5	132.323	398.972	515.639	35.8611	626.667	287.361	783.667	368.167	6019.81	92.1667	218.639	138.944	735.889	93.9444	129.639	269.861	35.5556	8.30556	57.1667	28.4706	121.647	100.361
NCI-H1299	2	1615.9	598.361	144.528	60.6667	6.91667	1	284.472	1163.35	44	104.167	675.667	345.111	1938.89	380.034	6.87829	5402.67	5273.56	1435.39	2748.39	754.444	197.639	48.9583	82.3333	100.833	58	217.495	1509.14	1561.64	36.1944	1249.83	339.528	1111.67	453.333	6677.64	110.333	590.972	173.778	913.222	112.278	168.972	432.861	58.8889	9.13889	85.3333	4.73691	59.2624	83.8611
NCI-H1299	4	1293.57	381.028	196.861	71.6667	6.58333	5.59906	212.472	499.514	54.6667	138.333	484.833	652.778	2183.22	989.87	12.6095	6459.5	4452.89	1029.72	1811.56	906.111	158.306	85.4583	91.3333	108	58.5	285.474	1042.64	845.472	36.8611	820.167	266.361	1329.33	503.833	6789.81	118.833	1014.97	243.444	1212.39	118.444	219.306	457.528	43.5556	10.8056	60.3333	11.2359	68.9149	75.3611
NCI-H1299	6	1365.07	485.861	322.028	55.1667	6.25	1	419.972	1044.35	52.8333	105.667	329.333	954.944	2068.06	699.225	8.7704	6379	3415.39	1143.06	1288.39	957.444	170.972	292.958	97.1667	120	69	177.185	445.639	560.639	34.8611	1024.5	191.028	852	387.667	6178.81	106.5	612.972	245.278	1013.89	113.944	260.972	401.694	59.2222	11.8056	51.8333	1	59.3173	87.1944
NCI-H1299	8	1150.9	463.028	352.194	36.3333	1.58333	1	298.472	281.181	43.6667	46	541.333	969.278	2328.22	771.729	2.73758	6313.33	5855.06	1099.89	3548.89	1405.61	248.639	128.125	86.8333	100.667	55.5	285.694	425.306	571.139	31.6944	1048.17	263.528	949.833	405.333	6581.31	95.6667	444.472	267.944	1155.89	112.111	289.639	551.861	72.0556	5.47222	62.3333	10.7972	65.8711	111.528
NCI-H1299	12	1793.74	846.861	421.028	46	4.08333	1	511.139	205.014	60.8333	41.1667	649.833	818.611	1500.72	400.162	1.06484	5507.33	6587.22	1215.06	3597.72	1156.11	461.806	57.7917	82.8333	88	44.6667	188.428	540.639	1493.97	33.5278	1301.67	438.528	757.167	325.833	7819.31	102.833	379.806	255.444	1300.06	118.778	271.639	714.694	77.7222	1.80556	80	1	38.0927	199.861
NCI-H1299	16	1665.57	1373.69	388.194	22	3.91667	29.1271	317.972	247.514	48.8333	15.3333	415.167	539.944	2531.39	693.933	15.3517	5645.67	4238.72	810.056	3216.06	1070.94	216.639	78.125	73	90.8333	52	331.022	432.639	828.472	34.5278	1103.33	479.194	526.667	264.5	7652.81	91.6667	247.472	319.278	1363.39	112.444	265.639	727.694	77.7222	4.13889	77.3333	51.08	91.73	91.0278
NCI-H1299	20	1772.57	1599.53	521.528	39.5	2.08333	35.0502	393.806	201.014	58.8333	43.6667	333.333	1065.78	2638.89	592.554	15.3791	5682.33	2818.39	719.222	3292.72	979.944	211.972	99.7917	71.6667	85.6667	48	301.461	403.639	868.639	35.1944	1118.67	503.861	531.667	238.667	7938.64	91	215.139	414.944	1462.72	131.778	274.306	851.861	81.5556	5.47222	94.1667	65.9975	166.098	136.028
NCI-H1299	24	1928.9	2518.53	571.528	68.6667	4.75	25.5348	456.806	195.847	70.8333	81	325	645.778	2737.06	919.697	20.8909	5843.67	3968.89	741.222	2349.56	822.444	133.139	52.2917	61.1667	92.6667	53.6667	273.217	256.306	738.139	34.8611	975.5	386.028	429.167	205	7140.64	91.6667	212.806	319.111	1079.89	111.778	203.306	594.861	58.0556	2.80556	82.6667	37.8626	104.646	153.528
NCI-H1299	36	2455.24	1455.69	834.861	61	9.91667	23.341	537.306	784.681	75.6667	99.6667	404.5	1300.11	3994.89	1091.5	28.6513	5545.17	3019.06	725.056	2345.39	937.611	229.972	133.458	94.5	90	49	312.403	226.639	894.639	34.5278	1493	507.694	634.667	254.667	7715.47	90.3333	196.306	669.611	1438.06	153.944	302.972	758.861	73.5556	4.80556	158.167	48.2007	110.048	284.028
NCI-H1299	48	1979.74	1022.86	884.694	60	5.91667	51.5856	408.306	969.181	89.3333	59.8333	608.667	999.944	5771.22	1473.87	42.6913	5232	2319.39	549.389	2328.72	514.444	266.139	121.208	119.833	69.8333	37.5	420.034	519.306	2453.64	32.0278	1945.67	554.944	815.833	298.917	7822.31	75.8333	171.806	1301.78	1322.72	193.278	267.972	842.028	58.0556	5.47222	217.667	72.1126	240.658	1455.86
NCI-H1299	72	1830.57	873.528	1087.36	78.8333	11.0833	67.9017	346.306	1048.68	189	72.5	249.167	766.944	5780.89	2067.83	43.9527	5527.5	1685.72	495.222	2167.39	409.111	410.972	87.7917	142.667	82.6667	44.6667	394.531	477.306	3315.81	35.5278	2320	398.944	524.833	198.25	7257.39	77.3333	174.639	1581.11	1406.72	207.444	183.972	645.194	45.8889	6.47222	106.667	128.986	312.833	3553.53
NCI-H1573	0	399.903	82.1944	107.361	281.167	514.583	2877.8	401.139	203.847	52.1667	109	364	1192.94	2754.89	1868.58	40.1539	2107.17	7799.06	1740.72	1930.39	1352.94	641.806	98.7917	40.5	93	58	104.128	47.4722	166.139	24.1944	1322.33	116.528	139	6	5040.47	88.8333	260.972	110.278	1963.39	79.7778	61.9722	247.194	23.2222	2.80556	18	27.807	116.057	179.694
NCI-H1573	2	505.736	444.694	113.028	324	1696.42	4126.78	560.639	386.847	50.3333	161.333	407.5	803.278	2008.72	2262.27	40.9962	2129.83	7782.89	2018.39	2461.89	1651.94	2912.14	303.625	73.6667	110	57	178.083	164.639	820.139	26.3611	3383.33	136.694	178.167	6.66667	5574.31	115.833	644.972	150.278	2568.72	79.6111	118.306	360.361	29.7222	4.47222	18.8333	19.8893	81.8588	123.528
NCI-H1573	4	536.069	443.694	160.194	336.5	2554.42	4460.93	608.639	351.514	45	248	418	2110.44	2688.72	3073.09	28.8669	2578.67	7698.39	1972.72	2238.56	1758.94	3078.31	603.458	124.5	125	61	137.399	86.4722	304.806	21.8611	3446	168.861	210.167	39.1667	6398.64	117.333	834.306	177.611	2919.72	73.1111	117.806	417.694	28.0556	2.63889	18.6667	12.3084	83.9646	165.361
NCI-H1573	6	513.069	412.694	180.194	863.167	2845.92	3948.97	600.472	298.514	42.3333	186	407.5	2445.44	2151.89	2520.61	40.8278	2586	7152.89	1938.39	2181.06	1673.44	2081.14	1040.29	133.5	116.333	61	167.386	76.6389	296.639	25.1944	3048.33	114.361	194	52.1667	6455.64	107.5	558.639	171.778	2577.39	69.6111	100.306	373.028	23.0556	1.47222	19.6667	25.3643	94.2408	158.028
NCI-H1573	8	705.236	710.194	254.528	442.667	3687.08	5993.01	826.806	459.014	48.6667	295.833	386.333	1850.78	2197.39	3536.36	60.6221	2757.67	7533.06	1882.22	2273.22	1669.61	3157.64	1221.46	129.833	111.167	56.1667	142.706	59.3056	369.806	24.5278	3108.5	110.694	282.833	66.1667	6541.97	100	503.806	170.278	2452.39	80.9444	108.306	706.028	27.5556	2.13889	21.3333	58.8884	127.26	38.0278
NCI-H1573	12	457.569	673.528	195.528	482.167	6581.08	11770.5	504.139	177.681	43.6667	287.833	368.167	1412.78	2079.39	3108.8	59.0217	2280	7456.39	2028.06	2286.06	1644.28	1953.81	685.792	84.3333	102	60	201.247	61.3056	423.972	23.8611	3071.83	116.028	273	53.3333	6256.97	99.6667	382.139	148.944	2305.39	83.7778	91.4722	433.194	27.7222	1.97222	26.1667	65.9638	117.91	192.361
NCI-H1573	16	549.736	785.028	255.694	1347.33	4609.25	5818.32	426.139	90.0139	58.5	350.333	402.667	2574.61	3602.22	2174.42	46.8924	2553.83	6952.22	2220.72	2175.39	2013.94	1249.64	1012.62	172.167	90	48	136.725	79.1389	76.4722	31.6944	1915.17	163.528	194.333	30.3333	6462.97	114.5	635.139	223.611	3019.72	92.2778	107.806	568.028	35.0556	4.47222	26.1667	32.7767	147.559	159.361
NCI-H1573	20	624.736	851.194	265.861	1080.67	4695.08	10495	354.472	45.0139	59	226.5	375.167	2439.28	2837.56	2659.76	54.2205	2262.17	7365.56	2183.06	2026.22	1895.94	737.306	659.625	120	85.3333	51	146.917	62.8056	7.30556	33.5278	1277.33	177.028	216.167	53	7106.81	106.667	414.472	186.278	2915.39	81.7778	85.9722	549.194	31.7222	4.80556	27.3333	57.1196	132.566	143.194
NCI-H1573	24	526.069	927.361	272.694	1133.17	4879.75	16792.2	262.472	29.5139	50.6667	157.333	324.833	3117.11	3279.22	3450.44	32.91	2549	8236.06	2087.06	2125.22	1771.11	693.972	1159.46	130.833	76.6667	45.3333	132.177	62.1389	19.4722	30.5278	1203.33	195.861	152	37.6667	6912.64	106	369.139	214.944	2943.06	93.2778	88.9722	568.361	30.0556	3.80556	24.5	53.4976	131.134	171.194
NCI-H1573	36	648.236	867.528	343.861	3235.17	7674.25	11096.9	414.806	56.1806	56.1667	136.333	287.667	2646.11	3865.22	2014.55	23.4761	2120.83	4850.39	2261.89	2098.22	1822.11	547.139	773.292	71	83.5	46	111.456	46.9722	17.4722	26.5278	1118.33	274.694	239.667	98.1667	8109.14	93.3333	322.472	250.611	2720.06	100.611	100.139	579.861	30.5556	2.47222	27	16.4358	113.782	173.528
NCI-H1573	48	516.069	574.361	366.861	2881.67	8983.92	10532	306.972	148.181	47.3333	177.833	251.5	2359.11	5146.89	2163.39	36.7004	1971.67	5318.89	2401.72	2356.89	1788.78	847.639	1129.62	62.8333	88.3333	51	238.645	59.4722	61.4722	33.3611	1298.5	323.861	285.667	136.333	8315.47	111.5	402.806	331.611	2377.22	109.778	107.806	551.528	35.7222	2.13889	28	48.1068	217.808	173.361
NCI-H1573	72	433.736	203.194	460.528	1111.83	13746.9	58.5742	285.472	1119.35	50.3333	91.5	226.167	1674.44	7013.89	1	37.4585	1737	3038.72	2258.56	1903.89	1601.94	2290.81	2847.46	41.3333	103.5	58.6667	361.623	54.9722	237.972	30.8611	3426.5	313.194	373.833	131.833	8077.81	110.333	577.306	430.611	2012.06	141.944	138.306	558.028	43.7222	2.13889	29.5	1	107.971	296.028
NCI-H1975	0	1221.24	29.3611	96.1944	26745.5	4893.58	16135.9	176.972	5265.35	52.8333	630.833	720	2001.61	2195.72	1847.09	11.6757	2413.67	6839.72	4395.56	2167.56	1431.11	496.639	401.458	176.667	145.833	69.3333	192.802	216.472	177.139	20.5278	4569.33	310.361	745.167	191.5	5131.47	103	332.306	106.444	3067.56	92.7778	104.306	1012.19	26.0556	3.80556	15.3333	4.07163	61.9226	32.1944
NCI-H1975	2	1220.9	73.1944	81.8611	20795.7	4949.92	15737.4	136.806	3222.18	57.6667	543.667	678	513.111	1183.89	2778.42	11.0091	1905.33	7644.89	4213.89	2350.72	961.778	343.806	107.292	156	161.5	79.3333	220.802	232.139	100.306	18.5278	4572.17	254.528	612	154	4607.14	95.6667	300.472	127.278	2616.22	63.9444	109.972	644.194	22.3889	4.47222	14.3333	6.90496	44.4226	24.8611
NCI-H1975	4	1541.4	73.8611	162.361	32471.8	7635.25	16485.9	288.472	6699.51	66.5	1107.83	1131	4439.11	1636.22	4086.75	16.3424	2944.67	8279.72	4801.72	2337.22	1985.61	1545.31	1183.96	383.333	159.333	78.5	344.969	455.472	213.306	20.0278	6730.5	218.194	728.833	172.5	4791.64	110.333	537.972	234.611	4352.39	86.9444	196.639	1281.36	28.7222	5.80556	16.8333	6.2383	65.5893	27.3611
NCI-H1975	6	1399.07	56.1944	185.028	26695.3	8760.08	16278.1	358.972	7706.68	56	477.833	836.833	3536.44	2029.39	3005.09	10.0091	2839.25	7896.22	4564.89	1850.89	1576.61	544.472	897.625	260.833	153.5	77.6667	296.135	315.806	142.472	18.3611	3942.5	186.694	909.5	206.167	4577.97	100.167	376.639	224.278	3996.39	85.6111	220.139	980.361	26.0556	15.8056	17.6667	1.7383	53.9226	34.3611
NCI-H1975	8	897.236	88.5278	164.194	26949.3	12013.6	16619.7	180.972	5300.51	45	610.667	917.5	3019.61	1532.06	2520.75	18.0091	2339.17	9783.39	4122.56	2777.06	1614.61	631.806	446.458	217.167	152.5	68.6667	244.969	321.639	241.472	20.1944	4410.67	206.361	943.833	210.667	4817.97	97	408.139	228.611	4062.22	80.4444	192.972	642.694	33.0556	3.80556	24.8333	9.7383	73.9226	220.861
NCI-H1975	12	1726.24	94.1944	235.361	32336.8	15543.6	16317.1	446.639	7007.01	57.6667	803.167	801	2526.28	1479.06	1834.42	22.0091	2128.5	8460.06	4546.56	3750.39	1288.61	588.972	152.792	164.333	153	75.3333	155.302	210.472	202.139	23.5278	3928	270.694	963.667	266.167	5450.64	100.833	353.306	234.444	4001.06	95.2778	152.306	1831.03	24.3889	6.47222	42.6667	10.2383	107.256	41.5278
NCI-H1975	16	1658.9	310.528	457.194	26365.5	25650.9	16643.4	336.139	2430.85	51.3333	246	711	4642.44	2818.06	2174.59	9.00908	2348	9506.06	5511.89	4135.89	1746.44	985.806	950.625	253.667	166	72.3333	420.635	146.806	343.306	21.8611	5189.17	550.028	997.167	301.833	7354.14	100.333	304.306	331.944	2588.72	129.278	168.972	1256.53	36.8889	5.47222	23	1	72.0893	62.3611
NCI-H1975	20	1705.74	305.861	490.361	27264.8	27657.6	16837.7	377.306	1870.35	66.8333	218.333	830	6335.61	2803.22	2026.75	4.00908	2542.17	10645.2	5724.22	4337.72	1570.94	1003.31	1137.62	257	152	68.5	457.802	125.806	392.639	21.5278	5815.83	528.694	614.167	191	6868.64	106.167	300.472	294.944	2177.72	121.944	146.806	968.528	33.3889	4.47222	21.8333	1	64.0893	70.0278
NCI-H1975	24	1900.24	300.694	454.028	28464.5	23766.4	15966.6	416.806	3719.51	64.1667	339.333	724.167	5343.44	2286.89	1913.59	6.84241	1907.67	7828.72	5437.72	3601.39	1767.44	1042.31	1254.62	249.667	142.5	71	443.802	143.639	373.472	22.8611	5411	537.861	815.833	257	6845.47	100	300.472	312.444	2656.39	122.944	177.972	1263.53	37.5556	3.13889	23.8333	1	70.7559	70.3611
NCI-H1975	36	2083.9	181.194	462.361	24776.5	25567.9	16158.2	572.306	5053.85	86	264.333	992.5	5463.78	2898.72	1521.75	7.34241	1806.33	9774.06	6185.22	4491.72	1736.61	739.972	435.958	212	159.333	74.6667	491.802	103.972	522.139	21.8611	6261.33	560.194	442.5	133.667	6721.81	92	190.639	320.444	2653.72	119.944	146.639	1414.53	43.5556	2.47222	37	1	81.4226	94.6944
NCI-H1975	48	1928.07	96.6944	544.028	23325.5	25273.4	15476.6	455.972	8542.01	64	187.167	675.333	5421.28	2803.06	1818.75	13.3424	1320.67	6726.39	6347.56	3334.06	1369.78	718.639	347.292	165.167	171	72	719.469	144.972	824.639	28.5278	6146.5	657.361	300.333	112.667	6771.31	95.6667	207.806	600.111	3015.39	129.778	140.972	1750.36	50.7222	6.47222	36.5	4.90496	117.756	191.194
NCI-H1975	72	1864.57	63.1944	815.861	19783.7	22970.6	15423.9	322.806	11413.3	67.6667	423.333	377.833	3892.78	4458.06	1823.25	8.75908	1843.67	6403.22	7141.06	3028.56	926.278	953.139	129.458	96	214.333	83	1036.55	150.639	1192.14	27.1944	6084	725.694	167.667	98	5162.31	98	204.306	707.278	4018.89	129.944	135.306	1875.53	42.0556	15.8056	25.5	10.7383	168.089	403.361
SW-1573	0	697.903	41.5278	65.5278	336.5	120.917	5336.41	3655.81	9431.68	94.6667	83	1431.33	4616.61	574.222	351.086	33.3424	7930.33	9475.72	2100.72	1178.89	965.444	346.972	488.958	80	97.5	55	352.135	434.972	235.972	26.0278	913	124.694	11.3333	13	7.63889	75.6667	144.639	51.6111	14097.6	32.1111	98.3056	1654.69	19.0556	15.8056	57.6667	28.405	76.0893	45.0278
SW-1573	2	594.569	340.361	66.6944	418.667	300.917	5918.74	3340.64	7626.18	84.8333	111	2054.17	1611.11	528.722	341.586	17.5091	6415	9709.89	2460.89	1284.56	1092.44	573.639	932.625	84.1667	122.333	75.6667	695.302	1239.47	486.639	21.8611	967	169.361	127.5	34.8333	13.8056	79	183.472	41.6111	13137.1	35.2778	90.1389	1467.03	19.7222	15.8056	62	11.2383	53.0893	47.3611
SW-1573	4	534.569	270.861	69.6944	174.833	698.25	6903.74	4047.14	7368.68	61.5	58	954	1762.78	589.889	260.253	22.6757	7362	9759.56	1656.39	1169.39	968.444	431.139	198.292	88.3333	140.333	77.1667	386.969	1117.97	580.139	14.1944	918.833	107.194	71.5	26	3.47222	73.5	170.472	53.9444	13052.7	40.6111	68.3056	2062.86	19.0556	19.1389	84.6667	6.07163	50.7559	48.6944
SW-1573	6	604.569	194.528	87.8611	1088.67	1135.92	8655.07	4832.64	11599.3	70.8333	182	1158.67	2987.11	703.222	238.253	30.5091	7464.33	9015.39	1851.72	1350.56	801.278	545.972	814.625	99.6667	122	70.1667	367.802	809.139	370.139	22.6944	1153.17	155.361	58.6667	19.3333	11.4722	74.3333	208.806	47.9444	14085.6	32.9444	93.9722	1752.36	15.7222	12.8056	69.5	23.905	65.2559	41.0278
SW-1573	8	447.903	153.028	65.5278	1314.83	1558.92	10252.1	4325.31	8025.18	65	181.833	793.667	3238.94	514.889	319.42	28.0091	7188.5	9851.39	1741.89	1167.22	739.111	640.972	955.458	85.6667	108.333	64.3333	451.802	736.139	364.139	20.8611	1068	127.194	22.8333	1	16.1389	83.3333	177.306	49.9444	13238.9	30.9444	93.3056	1824.03	17.7222	10.4722	75.3333	21.905	61.7559	44.3611
SW-1573	12	426.903	248.861	65.3611	2152	2152.92	12332.6	4384.14	6570.01	63	310.667	784	2294.94	483.056	530.753	28.6757	6753	10610.1	1702.06	1185.06	806.444	551.306	1048.12	86	107	62.3333	561.969	898.972	401.139	23.5278	1079.67	162.361	25	11.3333	19.3056	85.3333	219.972	56.9444	13285.9	34.9444	97.3056	2052.86	20.0556	12.8056	78.8333	26.5716	66.5893	51.8611
SW-1573	16	415.569	383.028	77.8611	2194.83	7000.25	15353.7	4300.31	8963.01	56.8333	315.667	585	5394.94	524.556	713.086	18.0091	7186	12271.2	1634.06	1187.89	1022.78	578.972	1459.12	98	107.667	61	1358.8	1369.64	677.806	18.1944	1590.33	155.028	41.8333	12.5	18.4722	61.6667	180.806	89.2778	13110.1	50.6111	71.9722	3102.03	20.7222	17.1389	78.6667	13.0716	64.4226	58.6944
SW-1573	20	559.736	414.861	93.0278	1694	6290.92	15078.2	4555.64	8878.01	64.5	230.333	713.5	4193.78	632.722	695.086	18.1757	7670.5	12146.9	1772.22	1158.89	982.111	462.639	1651.79	106.5	115.667	72	1728.8	1642.47	594.139	23.8611	1591.67	167.528	93.3333	41.5	22.6389	70	123.972	67.2778	12128.2	34.4444	47.4722	2306.36	15.7222	13.1389	53	11.5716	57.0893	46.0278
SW-1573	24	515.069	399.694	83.8611	1096	4198.58	12938.6	4376.47	7861.51	66.3333	92.5	846.667	3009.44	821.389	463.92	18.8424	6430.5	11512.1	1930.39	1266.39	1226.28	344.306	649.625	100.833	107	73.5	1651.97	1841.97	772.306	26.1944	1394.67	117.861	9	1	3.80556	71.3333	136.972	70.1111	13948.6	33.6111	53.9722	2648.69	18.7222	13.1389	69	9.90496	61.2559	54.0278
SW-1573	36	565.569	426.028	102.694	1742.17	12279.8	15150.4	5468.14	22041.5	85.8333	281.667	738.833	4384.11	787.389	772.586	32.1757	7402.83	11893.6	1797.89	1428.22	1174.28	748.806	539.625	124.333	133.667	113.833	1376.64	3576.97	662.639	23.1944	1796.67	104.028	20.1667	1	4.47222	74.3333	152.972	105.944	12530.4	34.6111	87.3056	3242.53	18.3889	12.8056	47	25.0716	98.7559	344.028
SW-1573	48	600.069	345.528	103.361	1578.83	9802.08	14691.4	5869.31	25452	74	330.667	584	3204.94	950.722	647.086	15.3424	7469.83	8978.39	1957.06	1438.72	1013.28	464.472	783.125	120.667	112.667	77.8333	1744.14	3394.14	1141.64	30.3611	1780.5	153.528	30.5	16	14.4722	86.8333	121.139	123.944	14242.4	44.2778	123.306	3541.53	21.3889	15.4722	49.1667	8.40496	66.2559	440.361
SW-1573	72	692.903	113.694	103.028	1979.83	8426.58	9540.91	6682.47	24229	71.3333	623.167	400	1349.44	612.056	388.42	13.6757	6068.83	8803.56	1905.56	1478.22	559.111	771.972	1059.46	139.667	116.333	73.6667	1480.3	2475.81	1458.81	26.0278	3236	149.528	3.16667	26.5	7.13889	83	96.1389	80.7778	14875.6	51.9444	64.9722	3420.36	20.8889	13.8056	41.8333	4.90496	54.9226	657.028

## Sheet: Log transform
Cell line	Time	ATR (Total)	Chk1 (Ser345)	Chk2 (Thr68)	P53 (Total)	P53 (Ser15)	p53 (Ser46)	MDM2 (Total)	p21 (Total)	H2A.X (Ser139)	Cleaved PARP	IRS-1 (Ser636/639)	Akt (Ser473)	BAD (Ser136)	BAD (Ser112)	Bcl-2 (Ser70)	GSK-3α/β (Ser21/9)	S6 ribosomal protein (Ser235/236)	PTEN (Ser380)	mTOR (Ser2448)	P70S6K (Thr389)	MEK1 (Ser217/221)	ERK1/2 (Thr202/Tyr204)	P90RSK (Ser380)	P38 (Thr180/Tyr182)	HSP27 (Ser78)	JNK (Thr183/Tyr185)	c-Jun (Ser63)	ATF2 (Thr71)	STAT1 (Tyr701)	STAT3 Ser727 (52)	TGFβRII (Total)	Smad2 (Ser465/467)	Smad3 (Ser423/425)	Smad4 (Total)	NF-κB (Ser536)	IκBα (Ser32/36)	BAD (Total)	Bcl-xL (Total)	BIM (Total)	MCL-1 (Total)	Bcl-xL/BAK Dimer (Total)	MCL-1/BAK Dimer (Total)	BAX/Bcl-2 Dimer (Total)	Survivin (Total)	Active Caspase-8	Active Caspase-9	Active Caspase 3
A549	0	759.236	78.8611	41.8611	91	23.4167	677.407	1222.14	6944.35	64.3333	442.167	588.5	1842.28	845.222	489.086	19.5091	8607.83	15134.1	2607.56	1555.72	1121.11	5031.31	68.9583	7.16667	89.1667	55.5	36.9688	125.806	17.9722	37.3611	2480.83	707.028	423.667	55.6667	3773.97	181.333	650.639	49.6111	9260.89	67.9444	85.6389	1376.03	27.7222	11.9722	23.6667	15.5716	349.423	89.8611
A549	2	654.069	496.528	116.694	128.5	48.9167	1082.74	1220.14	6483.85	73.6667	518	777.833	5775.44	700.722	969.253	19.1757	10850	14694.4	2518.39	1371.22	1193.94	6118.97	370.958	10	88.6667	54.5	57.4688	87.3056	42.3056	23.3611	2771.5	724.861	504	67.3333	3636.64	96.3333	350.806	52.9444	9031.22	65.2778	104.306	1295.19	33.0556	12.1389	24.8333	21.905	299.256	69.0278
A549	4	657.569	283.528	149.194	152	164.917	2260.57	1321.97	7144.35	68.6667	470.167	621.833	8677.28	812.889	1121.75	23.6757	11862.5	15976.9	2438.39	1480.39	1142.78	6651.47	895.625	17.8333	92.6667	54.6667	60.6355	47.3056	36.6389	10.8611	3843.67	626.361	697	105.5	4000.14	83	349.806	54.7778	9494.56	56.7778	108.306	1346.69	32.0556	15.4722	29	31.5716	331.089	65.3611
A549	6	629.903	340.194	201.694	144.833	271.75	3854.07	2366.47	9536.85	64.3333	764	588.333	6308.61	1060.72	1102.25	23.1757	11302.5	15424.4	2389.89	1472.39	1139.28	4584.81	526.625	14.6667	89.8333	55.6667	77.3022	131.472	27.9722	32.5278	3558.67	559.528	506.333	115.333	4324.31	153.333	563.806	48.1111	9212.22	45.6111	100.972	1386.36	24.5556	9.13889	30.3333	27.0716	339.423	55.3611
A549	8	622.569	446.361	187.694	136.667	280.25	3301.74	2655.81	10853.5	66.8333	775.167	602.5	5291.78	773.056	837.42	20.0091	11219.2	14445.9	2587.39	1344.39	1182.61	4518.47	526.792	12.3333	90.6667	57	96.1355	61.6389	33.4722	16.3611	3523.67	521.361	408.167	85.5	4497.31	79	243.472	52.9444	9352.89	49.1111	103.639	1404.69	25.7222	11.1389	35	21.905	290.423	49.5278
A549	12	699.903	584.861	204.528	202.667	628.917	5693.07	3166.64	14509.5	60	624.167	609.167	8506.78	890.389	893.42	24.3424	10987.5	14826.2	2682.22	1499.56	1245.94	4611.97	498.292	13.6667	87.5	51.6667	107.135	72.6389	63.8056	11.1944	4187.33	701.194	384	75.8333	4916.97	75.8333	245.139	60.2778	10257.6	49.2778	112.306	1693.69	27.5556	13.8056	43	27.905	318.589	52.6944
A549	16	1151.24	866.028	293.528	433.667	2352.25	9138.41	4877.31	18576.7	69.3333	659.5	625.833	12040.6	907.222	816.253	17.0091	11859.7	15505.2	2859.72	1767.72	1381.78	4365.81	670.292	16.3333	96	58.3333	172.302	33.4722	97.1389	12.1944	5891.83	755.361	231	25	5253.64	84.1667	288.639	72.2778	9730.72	29.2778	109.306	2248.19	47.0556	10.4722	39.3333	19.7383	266.256	54.3611
A549	20	1301.07	1032.36	362.194	784.167	3829.58	10997.4	6035.81	23625.3	67.3333	714	544	12270.8	1608.06	792.42	18.1757	11448.2	16133.2	3322.72	1707.39	1414.44	4715.81	391.792	18.3333	97.1667	60.3333	124.635	21.3056	70.4722	12.8611	7200.33	831.194	226.833	47.3333	5434.97	85.6667	272.306	80.9444	10982.4	34.6111	120.139	1927.19	36.0556	9.13889	37.6667	17.405	277.089	58.0278
A549	24	1105.07	651.194	339.861	481.667	1120.75	10341.4	5225.97	26626.3	70	406.167	388.167	10219.1	1581.39	788.586	17.0091	10606.7	14602.4	2657.39	1248.06	1182.61	1769.47	512.958	7.66667	84.6667	53	126.135	35.6389	1	10.1944	4420.17	975.194	232.667	50	5634.47	121.667	496.806	76.6111	10330.9	27.2778	98.6389	1847.03	37.0556	7.97222	38.5	12.905	309.256	58.0278
A549	36	982.903	264.361	303.528	211.667	618.25	7681.24	4070.47	31201.7	63.1667	569.333	397.833	8763.78	1409.22	762.92	12.6757	10003.3	15342.6	3270.22	1461.06	1280.44	2039.81	308.625	8	87.3333	50.6667	134.135	13.3056	10.8056	7.19444	5401.67	1241.36	180.5	31.1667	5217.47	80.5	256.472	77.6111	10958.7	28.1111	94.6389	1603.53	34.3889	9.13889	27.8333	13.5716	389.589	62.0278
A549	48	1058.4	85.8611	408.861	207.833	1065.92	7390.74	4299.31	32489.8	64	300.5	351	9689.78	1994.06	535.753	9.17574	9703.17	12852.7	4406.56	1875.39	1417.61	1421.64	208.792	7.66667	90.6667	53.1667	126.302	5.97222	74.8056	8.69444	5733.67	1583.19	222.333	60	5989.31	72.6667	236.306	110.944	12061.6	26.9444	123.472	2284.19	47.8889	9.47222	25.3333	10.5716	629.756	52.6944
A549	72	809.236	45.1944	392.194	108	1367.25	5137.24	3981.81	32334.2	59.6667	563	294.5	6615.11	1966.39	328.42	10.6757	9256	11156.7	4662.06	1704.89	1110.94	1666.31	118.792	8.33333	104	52.8333	183.802	22.6389	273.639	15.5278	7383.67	1676.03	171.833	78.3333	5119.81	110	425.806	88.4444	11623.6	27.2778	74.3056	3023.19	54.0556	10.4722	23.3333	7.90496	716.756	61.6944
NCI-H358	0	344.403	35.8611	45.8611	60	2.91667	47.7404	90.3056	2870.51	19.3333	607.5	359.167	619.278	1421.39	1331.75	16.6757	4689.67	4115.22	1134.56	2529.06	1704.61	2170.31	186.792	388	106.667	48.3333	102.802	140.806	1	37.8611	589.667	291.194	113	235	3491.14	111.667	403.139	59.6111	4565.22	98.9444	158.639	1400.36	41.7222	11.1389	16.3333	17.405	72.4226	70.1944
NCI-H358	2	370.569	512.028	66.6944	42.3333	1.58333	43.4071	116.139	3203.85	35.3333	617.5	563.667	297.944	525.056	2039.59	16.3424	4036.58	3207.64	1216.72	2898.56	2015.11	3132.47	185.958	355	113.667	51.8333	301.802	421.806	65.4722	28.1944	1272.67	307.194	124.833	165.5	3805.81	97.6667	468.306	53.6111	4380.56	89.4444	193.306	1012.53	49.0556	15.4722	19	15.5716	71.9226	58.6944
NCI-H358	4	435.236	362.194	116.528	26.6667	1	32.0737	248.972	2856.01	42	489.5	469.333	725.778	802.389	2138.42	10.0091	5468	5775.72	1238.39	2579.39	2349.11	2119.81	701.125	560.333	109	53.3333	282.802	154.139	2.47222	16.0278	1721	309.528	124.333	174.667	3889.31	85.5	314.139	60.9444	4607.22	79.2778	221.972	1184.36	54.2222	9.13889	18.6667	10.0716	64.7559	77.5278
NCI-H358	6	363.403	210.194	130.194	44.1667	1.25	46.7404	214.306	2533.35	39	741.5	496.5	1251.94	1014.39	2144.75	13.3424	5400	5588.39	1404.22	2894.72	2489.28	2910.81	574.458	568.333	109	50	173.302	165.306	1	24.8611	1795	292.694	119.333	202	4230.64	104.333	365.972	87.9444	5470.72	92.6111	257.472	1831.36	55.0556	9.30556	23.6667	17.5716	86.0893	75.8611
NCI-H358	8	452.903	307.194	180.028	62.8333	1.58333	46.7404	395.472	3987.68	51.3333	416.333	441.167	1002.44	914.056	2028.59	17.0091	5479.17	6051.56	1428.06	2794.22	2468.11	2463.14	442.125	453.75	100.167	45.5	165.469	122.306	1	21.5278	1418.25	294.028	93.6667	184.333	4006.14	96.8333	336.139	81.6111	5313.06	88.4444	217.639	1362.19	46.8889	11.4722	22.1667	19.7383	84.5893	67.0278
NCI-H358	12	635.569	528.861	173.361	55.3333	3.41667	73.4071	480.472	3260.51	45	872.333	422.5	1248.69	861.556	1998.59	27.3424	5030.58	7515.06	1213.39	2310.72	2173.78	3481.64	264.458	449.667	110	50.1667	134.635	133.806	17.4722	25.1944	1874.17	389.194	83.3333	183.667	4347.47	96.3333	319.472	104.278	5846.56	122.111	257.639	1932.36	61.7222	12.3056	31.6667	34.7383	110.923	66.8611
NCI-H358	16	767.236	412.028	186.861	44.1667	0.583333	85.9071	517.472	3082.01	42.6667	651.833	398.917	811.944	1673.89	2204.75	28.6757	3213.83	5874.06	1230.22	2337.72	2246.86	2092.97	276.792	554.167	96.8333	47.6667	266.802	151.472	19.4722	33.3611	1863.17	467.861	101.5	155.667	4586.31	106.667	243.639	123.611	5321.72	125.278	243.306	1510.69	67.7222	14.1389	32.5	39.5716	103.423	64.1944
NCI-H358	20	815.569	685.694	257.361	41.1667	6.58333	57.0737	572.139	4107.35	53	396.5	502	1077.53	1413.81	1857.75	17.8424	4250.25	6267.56	1227.47	1715.72	2326.19	2633.97	491.958	498.333	109.333	53.6667	303.302	146.972	23.6389	27.1944	2182.33	455.694	84.5	140.833	4539.64	109.833	287.472	133.278	5394.89	129.611	264.972	1292.19	65.3889	14.8056	32	27.0716	87.4226	56.6944
NCI-H358	24	677.069	552.861	191.528	37.1667	2.25	114.74	364.306	1803.68	28.3333	328.667	510.333	1345.94	1090.39	2012.75	30.5091	4718.5	6622.72	1244.72	2793.22	2432.78	3012.31	354.458	517.167	106.333	47.3333	217.802	139.472	45.3056	29.6944	2292.67	456.528	62.8333	116	4336.81	107	241.472	120.278	5053.56	116.278	240.972	1920.69	67.2222	12.1389	35.1667	45.2383	112.423	87.5278
NCI-H358	36	881.569	409.194	264.528	58.1667	5.25	143.24	574.472	5635.01	44.5	557.333	584.833	1757.11	1526.56	2209.75	34.3424	4679.5	6186.56	1379.39	2732.56	2550.78	4211.14	667.125	636.167	109.333	50.6667	224.969	88.8056	15.1389	26.5278	2825.17	593.528	100.167	153.333	5067.64	102.167	197.472	127.611	5349.39	124.778	275.306	2220.86	82.0556	9.47222	46.6667	62.5716	143.589	65.0278
NCI-H358	48	1313.74	496.528	349.528	34.6667	3.91667	66.0737	685.472	13336.7	47.8333	231.667	605.833	1304.11	1859.56	1080.42	25.3424	4162.33	5686.89	1392.22	2484.56	1922.61	2256.47	233.625	343.667	103	51.6667	293.302	135.639	5.80556	38.5278	1899.67	559.028	62.8333	126.5	5003.14	123	174.639	171.278	4493.39	120.778	248.306	2150.36	73.3889	8.80556	52.6667	24.2383	91.0893	57.6944
NCI-H358	72	977.403	242.861	449.028	67.6667	12.5833	49.7404	650.639	17854.2	55.1667	204.667	429.5	1159.61	2677.22	1952.09	17.1757	3598.17	5062.72	1402.06	2440.22	1181.44	2677.14	126.292	348	118	55.6667	308.969	109.972	60.9722	50.0278	1901	535.694	38.6667	98.3333	5349.47	130.833	203.306	252.611	4233.89	91.9444	174.639	3728.03	79.5556	6.13889	48.3333	22.7383	128.089	94.3611
NCI-H1299	0	1260.24	104.194	103.361	67.6667	2.91667	23.7661	207.806	748.514	47.8333	91.5	460.833	408.444	1888.06	351.406	12.3764	6527.17	3627.39	945.056	2340.06	905.111	71.6389	1	48.1667	97.3333	53.5	132.323	398.972	515.639	35.8611	626.667	287.361	783.667	368.167	6019.81	92.1667	218.639	138.944	735.889	93.9444	129.639	269.861	35.5556	8.30556	57.1667	28.4706	121.647	100.361
NCI-H1299	2	1615.9	598.361	144.528	60.6667	6.91667	1	284.472	1163.35	44	104.167	675.667	345.111	1938.89	380.034	6.87829	5402.67	5273.56	1435.39	2748.39	754.444	197.639	48.9583	82.3333	100.833	58	217.495	1509.14	1561.64	36.1944	1249.83	339.528	1111.67	453.333	6677.64	110.333	590.972	173.778	913.222	112.278	168.972	432.861	58.8889	9.13889	85.3333	4.73691	59.2624	83.8611
NCI-H1299	4	1293.57	381.028	196.861	71.6667	6.58333	5.59906	212.472	499.514	54.6667	138.333	484.833	652.778	2183.22	989.87	12.6095	6459.5	4452.89	1029.72	1811.56	906.111	158.306	85.4583	91.3333	108	58.5	285.474	1042.64	845.472	36.8611	820.167	266.361	1329.33	503.833	6789.81	118.833	1014.97	243.444	1212.39	118.444	219.306	457.528	43.5556	10.8056	60.3333	11.2359	68.9149	75.3611
NCI-H1299	6	1365.07	485.861	322.028	55.1667	6.25	1	419.972	1044.35	52.8333	105.667	329.333	954.944	2068.06	699.225	8.7704	6379	3415.39	1143.06	1288.39	957.444	170.972	292.958	97.1667	120	69	177.185	445.639	560.639	34.8611	1024.5	191.028	852	387.667	6178.81	106.5	612.972	245.278	1013.89	113.944	260.972	401.694	59.2222	11.8056	51.8333	1	59.3173	87.1944
NCI-H1299	8	1150.9	463.028	352.194	36.3333	1.58333	1	298.472	281.181	43.6667	46	541.333	969.278	2328.22	771.729	2.73758	6313.33	5855.06	1099.89	3548.89	1405.61	248.639	128.125	86.8333	100.667	55.5	285.694	425.306	571.139	31.6944	1048.17	263.528	949.833	405.333	6581.31	95.6667	444.472	267.944	1155.89	112.111	289.639	551.861	72.0556	5.47222	62.3333	10.7972	65.8711	111.528
NCI-H1299	12	1793.74	846.861	421.028	46	4.08333	1	511.139	205.014	60.8333	41.1667	649.833	818.611	1500.72	400.162	1.06484	5507.33	6587.22	1215.06	3597.72	1156.11	461.806	57.7917	82.8333	88	44.6667	188.428	540.639	1493.97	33.5278	1301.67	438.528	757.167	325.833	7819.31	102.833	379.806	255.444	1300.06	118.778	271.639	714.694	77.7222	1.80556	80	1	38.0927	199.861
NCI-H1299	16	1665.57	1373.69	388.194	22	3.91667	29.1271	317.972	247.514	48.8333	15.3333	415.167	539.944	2531.39	693.933	15.3517	5645.67	4238.72	810.056	3216.06	1070.94	216.639	78.125	73	90.8333	52	331.022	432.639	828.472	34.5278	1103.33	479.194	526.667	264.5	7652.81	91.6667	247.472	319.278	1363.39	112.444	265.639	727.694	77.7222	4.13889	77.3333	51.08	91.73	91.0278
NCI-H1299	20	1772.57	1599.53	521.528	39.5	2.08333	35.0502	393.806	201.014	58.8333	43.6667	333.333	1065.78	2638.89	592.554	15.3791	5682.33	2818.39	719.222	3292.72	979.944	211.972	99.7917	71.6667	85.6667	48	301.461	403.639	868.639	35.1944	1118.67	503.861	531.667	238.667	7938.64	91	215.139	414.944	1462.72	131.778	274.306	851.861	81.5556	5.47222	94.1667	65.9975	166.098	136.028
NCI-H1299	24	1928.9	2518.53	571.528	68.6667	4.75	25.5348	456.806	195.847	70.8333	81	325	645.778	2737.06	919.697	20.8909	5843.67	3968.89	741.222	2349.56	822.444	133.139	52.2917	61.1667	92.6667	53.6667	273.217	256.306	738.139	34.8611	975.5	386.028	429.167	205	7140.64	91.6667	212.806	319.111	1079.89	111.778	203.306	594.861	58.0556	2.80556	82.6667	37.8626	104.646	153.528
NCI-H1299	36	2455.24	1455.69	834.861	61	9.91667	23.341	537.306	784.681	75.6667	99.6667	404.5	1300.11	3994.89	1091.5	28.6513	5545.17	3019.06	725.056	2345.39	937.611	229.972	133.458	94.5	90	49	312.403	226.639	894.639	34.5278	1493	507.694	634.667	254.667	7715.47	90.3333	196.306	669.611	1438.06	153.944	302.972	758.861	73.5556	4.80556	158.167	48.2007	110.048	284.028
NCI-H1299	48	1979.74	1022.86	884.694	60	5.91667	51.5856	408.306	969.181	89.3333	59.8333	608.667	999.944	5771.22	1473.87	42.6913	5232	2319.39	549.389	2328.72	514.444	266.139	121.208	119.833	69.8333	37.5	420.034	519.306	2453.64	32.0278	1945.67	554.944	815.833	298.917	7822.31	75.8333	171.806	1301.78	1322.72	193.278	267.972	842.028	58.0556	5.47222	217.667	72.1126	240.658	1455.86
NCI-H1299	72	1830.57	873.528	1087.36	78.8333	11.0833	67.9017	346.306	1048.68	189	72.5	249.167	766.944	5780.89	2067.83	43.9527	5527.5	1685.72	495.222	2167.39	409.111	410.972	87.7917	142.667	82.6667	44.6667	394.531	477.306	3315.81	35.5278	2320	398.944	524.833	198.25	7257.39	77.3333	174.639	1581.11	1406.72	207.444	183.972	645.194	45.8889	6.47222	106.667	128.986	312.833	3553.53
NCI-H1573	0	399.903	82.1944	107.361	281.167	514.583	2877.8	401.139	203.847	52.1667	109	364	1192.94	2754.89	1868.58	40.1539	2107.17	7799.06	1740.72	1930.39	1352.94	641.806	98.7917	40.5	93	58	104.128	47.4722	166.139	24.1944	1322.33	116.528	139	6	5040.47	88.8333	260.972	110.278	1963.39	79.7778	61.9722	247.194	23.2222	2.80556	18	27.807	116.057	179.694
NCI-H1573	2	505.736	444.694	113.028	324	1696.42	4126.78	560.639	386.847	50.3333	161.333	407.5	803.278	2008.72	2262.27	40.9962	2129.83	7782.89	2018.39	2461.89	1651.94	2912.14	303.625	73.6667	110	57	178.083	164.639	820.139	26.3611	3383.33	136.694	178.167	6.66667	5574.31	115.833	644.972	150.278	2568.72	79.6111	118.306	360.361	29.7222	4.47222	18.8333	19.8893	81.8588	123.528
NCI-H1573	4	536.069	443.694	160.194	336.5	2554.42	4460.93	608.639	351.514	45	248	418	2110.44	2688.72	3073.09	28.8669	2578.67	7698.39	1972.72	2238.56	1758.94	3078.31	603.458	124.5	125	61	137.399	86.4722	304.806	21.8611	3446	168.861	210.167	39.1667	6398.64	117.333	834.306	177.611	2919.72	73.1111	117.806	417.694	28.0556	2.63889	18.6667	12.3084	83.9646	165.361
NCI-H1573	6	513.069	412.694	180.194	863.167	2845.92	3948.97	600.472	298.514	42.3333	186	407.5	2445.44	2151.89	2520.61	40.8278	2586	7152.89	1938.39	2181.06	1673.44	2081.14	1040.29	133.5	116.333	61	167.386	76.6389	296.639	25.1944	3048.33	114.361	194	52.1667	6455.64	107.5	558.639	171.778	2577.39	69.6111	100.306	373.028	23.0556	1.47222	19.6667	25.3643	94.2408	158.028
NCI-H1573	8	705.236	710.194	254.528	442.667	3687.08	5993.01	826.806	459.014	48.6667	295.833	386.333	1850.78	2197.39	3536.36	60.6221	2757.67	7533.06	1882.22	2273.22	1669.61	3157.64	1221.46	129.833	111.167	56.1667	142.706	59.3056	369.806	24.5278	3108.5	110.694	282.833	66.1667	6541.97	100	503.806	170.278	2452.39	80.9444	108.306	706.028	27.5556	2.13889	21.3333	58.8884	127.26	38.0278
NCI-H1573	12	457.569	673.528	195.528	482.167	6581.08	11770.5	504.139	177.681	43.6667	287.833	368.167	1412.78	2079.39	3108.8	59.0217	2280	7456.39	2028.06	2286.06	1644.28	1953.81	685.792	84.3333	102	60	201.247	61.3056	423.972	23.8611	3071.83	116.028	273	53.3333	6256.97	99.6667	382.139	148.944	2305.39	83.7778	91.4722	433.194	27.7222	1.97222	26.1667	65.9638	117.91	192.361
NCI-H1573	16	549.736	785.028	255.694	1347.33	4609.25	5818.32	426.139	90.0139	58.5	350.333	402.667	2574.61	3602.22	2174.42	46.8924	2553.83	6952.22	2220.72	2175.39	2013.94	1249.64	1012.62	172.167	90	48	136.725	79.1389	76.4722	31.6944	1915.17	163.528	194.333	30.3333	6462.97	114.5	635.139	223.611	3019.72	92.2778	107.806	568.028	35.0556	4.47222	26.1667	32.7767	147.559	159.361
NCI-H1573	20	624.736	851.194	265.861	1080.67	4695.08	10495	354.472	45.0139	59	226.5	375.167	2439.28	2837.56	2659.76	54.2205	2262.17	7365.56	2183.06	2026.22	1895.94	737.306	659.625	120	85.3333	51	146.917	62.8056	7.30556	33.5278	1277.33	177.028	216.167	53	7106.81	106.667	414.472	186.278	2915.39	81.7778	85.9722	549.194	31.7222	4.80556	27.3333	57.1196	132.566	143.194
NCI-H1573	24	526.069	927.361	272.694	1133.17	4879.75	16792.2	262.472	29.5139	50.6667	157.333	324.833	3117.11	3279.22	3450.44	32.91	2549	8236.06	2087.06	2125.22	1771.11	693.972	1159.46	130.833	76.6667	45.3333	132.177	62.1389	19.4722	30.5278	1203.33	195.861	152	37.6667	6912.64	106	369.139	214.944	2943.06	93.2778	88.9722	568.361	30.0556	3.80556	24.5	53.4976	131.134	171.194
NCI-H1573	36	648.236	867.528	343.861	3235.17	7674.25	11096.9	414.806	56.1806	56.1667	136.333	287.667	2646.11	3865.22	2014.55	23.4761	2120.83	4850.39	2261.89	2098.22	1822.11	547.139	773.292	71	83.5	46	111.456	46.9722	17.4722	26.5278	1118.33	274.694	239.667	98.1667	8109.14	93.3333	322.472	250.611	2720.06	100.611	100.139	579.861	30.5556	2.47222	27	16.4358	113.782	173.528
NCI-H1573	48	516.069	574.361	366.861	2881.67	8983.92	10532	306.972	148.181	47.3333	177.833	251.5	2359.11	5146.89	2163.39	36.7004	1971.67	5318.89	2401.72	2356.89	1788.78	847.639	1129.62	62.8333	88.3333	51	238.645	59.4722	61.4722	33.3611	1298.5	323.861	285.667	136.333	8315.47	111.5	402.806	331.611	2377.22	109.778	107.806	551.528	35.7222	2.13889	28	48.1068	217.808	173.361
NCI-H1573	72	433.736	203.194	460.528	1111.83	13746.9	58.5742	285.472	1119.35	50.3333	91.5	226.167	1674.44	7013.89	1	37.4585	1737	3038.72	2258.56	1903.89	1601.94	2290.81	2847.46	41.3333	103.5	58.6667	361.623	54.9722	237.972	30.8611	3426.5	313.194	373.833	131.833	8077.81	110.333	577.306	430.611	2012.06	141.944	138.306	558.028	43.7222	2.13889	29.5	1	107.971	296.028
NCI-H1975	0	1221.24	29.3611	96.1944	26745.5	4893.58	16135.9	176.972	5265.35	52.8333	630.833	720	2001.61	2195.72	1847.09	11.6757	2413.67	6839.72	4395.56	2167.56	1431.11	496.639	401.458	176.667	145.833	69.3333	192.802	216.472	177.139	20.5278	4569.33	310.361	745.167	191.5	5131.47	103	332.306	106.444	3067.56	92.7778	104.306	1012.19	26.0556	3.80556	15.3333	4.07163	61.9226	32.1944
NCI-H1975	2	1220.9	73.1944	81.8611	20795.7	4949.92	15737.4	136.806	3222.18	57.6667	543.667	678	513.111	1183.89	2778.42	11.0091	1905.33	7644.89	4213.89	2350.72	961.778	343.806	107.292	156	161.5	79.3333	220.802	232.139	100.306	18.5278	4572.17	254.528	612	154	4607.14	95.6667	300.472	127.278	2616.22	63.9444	109.972	644.194	22.3889	4.47222	14.3333	6.90496	44.4226	24.8611
NCI-H1975	4	1541.4	73.8611	162.361	32471.8	7635.25	16485.9	288.472	6699.51	66.5	1107.83	1131	4439.11	1636.22	4086.75	16.3424	2944.67	8279.72	4801.72	2337.22	1985.61	1545.31	1183.96	383.333	159.333	78.5	344.969	455.472	213.306	20.0278	6730.5	218.194	728.833	172.5	4791.64	110.333	537.972	234.611	4352.39	86.9444	196.639	1281.36	28.7222	5.80556	16.8333	6.2383	65.5893	27.3611
NCI-H1975	6	1399.07	56.1944	185.028	26695.3	8760.08	16278.1	358.972	7706.68	56	477.833	836.833	3536.44	2029.39	3005.09	10.0091	2839.25	7896.22	4564.89	1850.89	1576.61	544.472	897.625	260.833	153.5	77.6667	296.135	315.806	142.472	18.3611	3942.5	186.694	909.5	206.167	4577.97	100.167	376.639	224.278	3996.39	85.6111	220.139	980.361	26.0556	15.8056	17.6667	1.7383	53.9226	34.3611
NCI-H1975	8	897.236	88.5278	164.194	26949.3	12013.6	16619.7	180.972	5300.51	45	610.667	917.5	3019.61	1532.06	2520.75	18.0091	2339.17	9783.39	4122.56	2777.06	1614.61	631.806	446.458	217.167	152.5	68.6667	244.969	321.639	241.472	20.1944	4410.67	206.361	943.833	210.667	4817.97	97	408.139	228.611	4062.22	80.4444	192.972	642.694	33.0556	3.80556	24.8333	9.7383	73.9226	220.861
NCI-H1975	12	1726.24	94.1944	235.361	32336.8	15543.6	16317.1	446.639	7007.01	57.6667	803.167	801	2526.28	1479.06	1834.42	22.0091	2128.5	8460.06	4546.56	3750.39	1288.61	588.972	152.792	164.333	153	75.3333	155.302	210.472	202.139	23.5278	3928	270.694	963.667	266.167	5450.64	100.833	353.306	234.444	4001.06	95.2778	152.306	1831.03	24.3889	6.47222	42.6667	10.2383	107.256	41.5278
NCI-H1975	16	1658.9	310.528	457.194	26365.5	25650.9	16643.4	336.139	2430.85	51.3333	246	711	4642.44	2818.06	2174.59	9.00908	2348	9506.06	5511.89	4135.89	1746.44	985.806	950.625	253.667	166	72.3333	420.635	146.806	343.306	21.8611	5189.17	550.028	997.167	301.833	7354.14	100.333	304.306	331.944	2588.72	129.278	168.972	1256.53	36.8889	5.47222	23	1	72.0893	62.3611
NCI-H1975	20	1705.74	305.861	490.361	27264.8	27657.6	16837.7	377.306	1870.35	66.8333	218.333	830	6335.61	2803.22	2026.75	4.00908	2542.17	10645.2	5724.22	4337.72	1570.94	1003.31	1137.62	257	152	68.5	457.802	125.806	392.639	21.5278	5815.83	528.694	614.167	191	6868.64	106.167	300.472	294.944	2177.72	121.944	146.806	968.528	33.3889	4.47222	21.8333	1	64.0893	70.0278
NCI-H1975	24	1900.24	300.694	454.028	28464.5	23766.4	15966.6	416.806	3719.51	64.1667	339.333	724.167	5343.44	2286.89	1913.59	6.84241	1907.67	7828.72	5437.72	3601.39	1767.44	1042.31	1254.62	249.667	142.5	71	443.802	143.639	373.472	22.8611	5411	537.861	815.833	257	6845.47	100	300.472	312.444	2656.39	122.944	177.972	1263.53	37.5556	3.13889	23.8333	1	70.7559	70.3611
NCI-H1975	36	2083.9	181.194	462.361	24776.5	25567.9	16158.2	572.306	5053.85	86	264.333	992.5	5463.78	2898.72	1521.75	7.34241	1806.33	9774.06	6185.22	4491.72	1736.61	739.972	435.958	212	159.333	74.6667	491.802	103.972	522.139	21.8611	6261.33	560.194	442.5	133.667	6721.81	92	190.639	320.444	2653.72	119.944	146.639	1414.53	43.5556	2.47222	37	1	81.4226	94.6944
NCI-H1975	48	1928.07	96.6944	544.028	23325.5	25273.4	15476.6	455.972	8542.01	64	187.167	675.333	5421.28	2803.06	1818.75	13.3424	1320.67	6726.39	6347.56	3334.06	1369.78	718.639	347.292	165.167	171	72	719.469	144.972	824.639	28.5278	6146.5	657.361	300.333	112.667	6771.31	95.6667	207.806	600.111	3015.39	129.778	140.972	1750.36	50.7222	6.47222	36.5	4.90496	117.756	191.194
NCI-H1975	72	1864.57	63.1944	815.861	19783.7	22970.6	15423.9	322.806	11413.3	67.6667	423.333	377.833	3892.78	4458.06	1823.25	8.75908	1843.67	6403.22	7141.06	3028.56	926.278	953.139	129.458	96	214.333	83	1036.55	150.639	1192.14	27.1944	6084	725.694	167.667	98	5162.31	98	204.306	707.278	4018.89	129.944	135.306	1875.53	42.0556	15.8056	25.5	10.7383	168.089	403.361
SW-1573	0	697.903	41.5278	65.5278	336.5	120.917	5336.41	3655.81	9431.68	94.6667	83	1431.33	4616.61	574.222	351.086	33.3424	7930.33	9475.72	2100.72	1178.89	965.444	346.972	488.958	80	97.5	55	352.135	434.972	235.972	26.0278	913	124.694	11.3333	13	7.63889	75.6667	144.639	51.6111	14097.6	32.1111	98.3056	1654.69	19.0556	15.8056	57.6667	28.405	76.0893	45.0278
SW-1573	2	594.569	340.361	66.6944	418.667	300.917	5918.74	3340.64	7626.18	84.8333	111	2054.17	1611.11	528.722	341.586	17.5091	6415	9709.89	2460.89	1284.56	1092.44	573.639	932.625	84.1667	122.333	75.6667	695.302	1239.47	486.639	21.8611	967	169.361	127.5	34.8333	13.8056	79	183.472	41.6111	13137.1	35.2778	90.1389	1467.03	19.7222	15.8056	62	11.2383	53.0893	47.3611
SW-1573	4	534.569	270.861	69.6944	174.833	698.25	6903.74	4047.14	7368.68	61.5	58	954	1762.78	589.889	260.253	22.6757	7362	9759.56	1656.39	1169.39	968.444	431.139	198.292	88.3333	140.333	77.1667	386.969	1117.97	580.139	14.1944	918.833	107.194	71.5	26	3.47222	73.5	170.472	53.9444	13052.7	40.6111	68.3056	2062.86	19.0556	19.1389	84.6667	6.07163	50.7559	48.6944
SW-1573	6	604.569	194.528	87.8611	1088.67	1135.92	8655.07	4832.64	11599.3	70.8333	182	1158.67	2987.11	703.222	238.253	30.5091	7464.33	9015.39	1851.72	1350.56	801.278	545.972	814.625	99.6667	122	70.1667	367.802	809.139	370.139	22.6944	1153.17	155.361	58.6667	19.3333	11.4722	74.3333	208.806	47.9444	14085.6	32.9444	93.9722	1752.36	15.7222	12.8056	69.5	23.905	65.2559	41.0278
SW-1573	8	447.903	153.028	65.5278	1314.83	1558.92	10252.1	4325.31	8025.18	65	181.833	793.667	3238.94	514.889	319.42	28.0091	7188.5	9851.39	1741.89	1167.22	739.111	640.972	955.458	85.6667	108.333	64.3333	451.802	736.139	364.139	20.8611	1068	127.194	22.8333	1	16.1389	83.3333	177.306	49.9444	13238.9	30.9444	93.3056	1824.03	17.7222	10.4722	75.3333	21.905	61.7559	44.3611
SW-1573	12	426.903	248.861	65.3611	2152	2152.92	12332.6	4384.14	6570.01	63	310.667	784	2294.94	483.056	530.753	28.6757	6753	10610.1	1702.06	1185.06	806.444	551.306	1048.12	86	107	62.3333	561.969	898.972	401.139	23.5278	1079.67	162.361	25	11.3333	19.3056	85.3333	219.972	56.9444	13285.9	34.9444	97.3056	2052.86	20.0556	12.8056	78.8333	26.5716	66.5893	51.8611
SW-1573	16	415.569	383.028	77.8611	2194.83	7000.25	15353.7	4300.31	8963.01	56.8333	315.667	585	5394.94	524.556	713.086	18.0091	7186	12271.2	1634.06	1187.89	1022.78	578.972	1459.12	98	107.667	61	1358.8	1369.64	677.806	18.1944	1590.33	155.028	41.8333	12.5	18.4722	61.6667	180.806	89.2778	13110.1	50.6111	71.9722	3102.03	20.7222	17.1389	78.6667	13.0716	64.4226	58.6944
SW-1573	20	559.736	414.861	93.0278	1694	6290.92	15078.2	4555.64	8878.01	64.5	230.333	713.5	4193.78	632.722	695.086	18.1757	7670.5	12146.9	1772.22	1158.89	982.111	462.639	1651.79	106.5	115.667	72	1728.8	1642.47	594.139	23.8611	1591.67	167.528	93.3333	41.5	22.6389	70	123.972	67.2778	12128.2	34.4444	47.4722	2306.36	15.7222	13.1389	53	11.5716	57.0893	46.0278
SW-1573	24	515.069	399.694	83.8611	1096	4198.58	12938.6	4376.47	7861.51	66.3333	92.5	846.667	3009.44	821.389	463.92	18.8424	6430.5	11512.1	1930.39	1266.39	1226.28	344.306	649.625	100.833	107	73.5	1651.97	1841.97	772.306	26.1944	1394.67	117.861	9	1	3.80556	71.3333	136.972	70.1111	13948.6	33.6111	53.9722	2648.69	18.7222	13.1389	69	9.90496	61.2559	54.0278
SW-1573	36	565.569	426.028	102.694	1742.17	12279.8	15150.4	5468.14	22041.5	85.8333	281.667	738.833	4384.11	787.389	772.586	32.1757	7402.83	11893.6	1797.89	1428.22	1174.28	748.806	539.625	124.333	133.667	113.833	1376.64	3576.97	662.639	23.1944	1796.67	104.028	20.1667	1	4.47222	74.3333	152.972	105.944	12530.4	34.6111	87.3056	3242.53	18.3889	12.8056	47	25.0716	98.7559	344.028
SW-1573	48	600.069	345.528	103.361	1578.83	9802.08	14691.4	5869.31	25452	74	330.667	584	3204.94	950.722	647.086	15.3424	7469.83	8978.39	1957.06	1438.72	1013.28	464.472	783.125	120.667	112.667	77.8333	1744.14	3394.14	1141.64	30.3611	1780.5	153.528	30.5	16	14.4722	86.8333	121.139	123.944	14242.4	44.2778	123.306	3541.53	21.3889	15.4722	49.1667	8.40496	66.2559	440.361
SW-1573	72	692.903	113.694	103.028	1979.83	8426.58	9540.91	6682.47	24229	71.3333	623.167	400	1349.44	612.056	388.42	13.6757	6068.83	8803.56	1905.56	1478.22	559.111	771.972	1059.46	139.667	116.333	73.6667	1480.3	2475.81	1458.81	26.0278	3236	149.528	3.16667	26.5	7.13889	83	96.1389	80.7778	14875.6	51.9444	64.9722	3420.36	20.8889	13.8056	41.8333	4.90496	54.9226	657.028

## Sheet: Z scores
Cell line	Time	ATR (Total)	Chk1 (Ser345)	Chk2 (Thr68)	P53 (Total)	P53 (Ser15)	p53 (Ser46)	MDM2 (Total)	p21 (Total)	H2A.X (Ser139)	Cleaved PARP	IRS-1 (Ser636/639)	Akt (Ser473)	BAD (Ser136)	BAD (Ser112)	Bcl-2 (Ser70)	GSK-3α/β (Ser21/9)	S6 ribosomal protein (Ser235/236)	PTEN (Ser380)	mTOR (Ser2448)	P70S6K (Thr389)	MEK1 (Ser217/221)	ERK1/2 (Thr202/Tyr204)	P90RSK (Ser380)	P38 (Thr180/Tyr182)	HSP27 (Ser78)	JNK (Thr183/Tyr185)	c-Jun (Ser63)	ATF2 (Thr71)	STAT1 (Tyr701)	STAT3 Ser727 (52)	TGFβRII (Total)	Smad2 (Ser465/467)	Smad3 (Ser423/425)	Smad4 (Total)	NF-κB (Ser536)	IκBα (Ser32/36)	BAD (Total)	Bcl-xL (Total)	BIM (Total)	MCL-1 (Total)	Bcl-xL/BAK Dimer (Total)	MCL-1/BAK Dimer (Total)	BAX/Bcl-2 Dimer (Total)	Survivin (Total)	Active Caspase-8	Active Caspase-9	Active Caspase 3
A549	0	759.236	78.8611	41.8611	91	23.4167	677.407	1222.14	6944.35	64.3333	442.167	588.5	1842.28	845.222	489.086	19.5091	8607.83	15134.1	2607.56	1555.72	1121.11	5031.31	68.9583	7.16667	89.1667	55.5	36.9688	125.806	17.9722	37.3611	2480.83	707.028	423.667	55.6667	3773.97	181.333	650.639	49.6111	9260.89	67.9444	85.6389	1376.03	27.7222	11.9722	23.6667	15.5716	349.423	89.8611
A549	2	654.069	496.528	116.694	128.5	48.9167	1082.74	1220.14	6483.85	73.6667	518	777.833	5775.44	700.722	969.253	19.1757	10850	14694.4	2518.39	1371.22	1193.94	6118.97	370.958	10	88.6667	54.5	57.4688	87.3056	42.3056	23.3611	2771.5	724.861	504	67.3333	3636.64	96.3333	350.806	52.9444	9031.22	65.2778	104.306	1295.19	33.0556	12.1389	24.8333	21.905	299.256	69.0278
A549	4	657.569	283.528	149.194	152	164.917	2260.57	1321.97	7144.35	68.6667	470.167	621.833	8677.28	812.889	1121.75	23.6757	11862.5	15976.9	2438.39	1480.39	1142.78	6651.47	895.625	17.8333	92.6667	54.6667	60.6355	47.3056	36.6389	10.8611	3843.67	626.361	697	105.5	4000.14	83	349.806	54.7778	9494.56	56.7778	108.306	1346.69	32.0556	15.4722	29	31.5716	331.089	65.3611
A549	6	629.903	340.194	201.694	144.833	271.75	3854.07	2366.47	9536.85	64.3333	764	588.333	6308.61	1060.72	1102.25	23.1757	11302.5	15424.4	2389.89	1472.39	1139.28	4584.81	526.625	14.6667	89.8333	55.6667	77.3022	131.472	27.9722	32.5278	3558.67	559.528	506.333	115.333	4324.31	153.333	563.806	48.1111	9212.22	45.6111	100.972	1386.36	24.5556	9.13889	30.3333	27.0716	339.423	55.3611
A549	8	622.569	446.361	187.694	136.667	280.25	3301.74	2655.81	10853.5	66.8333	775.167	602.5	5291.78	773.056	837.42	20.0091	11219.2	14445.9	2587.39	1344.39	1182.61	4518.47	526.792	12.3333	90.6667	57	96.1355	61.6389	33.4722	16.3611	3523.67	521.361	408.167	85.5	4497.31	79	243.472	52.9444	9352.89	49.1111	103.639	1404.69	25.7222	11.1389	35	21.905	290.423	49.5278
A549	12	699.903	584.861	204.528	202.667	628.917	5693.07	3166.64	14509.5	60	624.167	609.167	8506.78	890.389	893.42	24.3424	10987.5	14826.2	2682.22	1499.56	1245.94	4611.97	498.292	13.6667	87.5	51.6667	107.135	72.6389	63.8056	11.1944	4187.33	701.194	384	75.8333	4916.97	75.8333	245.139	60.2778	10257.6	49.2778	112.306	1693.69	27.5556	13.8056	43	27.905	318.589	52.6944
A549	16	1151.24	866.028	293.528	433.667	2352.25	9138.41	4877.31	18576.7	69.3333	659.5	625.833	12040.6	907.222	816.253	17.0091	11859.7	15505.2	2859.72	1767.72	1381.78	4365.81	670.292	16.3333	96	58.3333	172.302	33.4722	97.1389	12.1944	5891.83	755.361	231	25	5253.64	84.1667	288.639	72.2778	9730.72	29.2778	109.306	2248.19	47.0556	10.4722	39.3333	19.7383	266.256	54.3611
A549	20	1301.07	1032.36	362.194	784.167	3829.58	10997.4	6035.81	23625.3	67.3333	714	544	12270.8	1608.06	792.42	18.1757	11448.2	16133.2	3322.72	1707.39	1414.44	4715.81	391.792	18.3333	97.1667	60.3333	124.635	21.3056	70.4722	12.8611	7200.33	831.194	226.833	47.3333	5434.97	85.6667	272.306	80.9444	10982.4	34.6111	120.139	1927.19	36.0556	9.13889	37.6667	17.405	277.089	58.0278
A549	24	1105.07	651.194	339.861	481.667	1120.75	10341.4	5225.97	26626.3	70	406.167	388.167	10219.1	1581.39	788.586	17.0091	10606.7	14602.4	2657.39	1248.06	1182.61	1769.47	512.958	7.66667	84.6667	53	126.135	35.6389	1	10.1944	4420.17	975.194	232.667	50	5634.47	121.667	496.806	76.6111	10330.9	27.2778	98.6389	1847.03	37.0556	7.97222	38.5	12.905	309.256	58.0278
A549	36	982.903	264.361	303.528	211.667	618.25	7681.24	4070.47	31201.7	63.1667	569.333	397.833	8763.78	1409.22	762.92	12.6757	10003.3	15342.6	3270.22	1461.06	1280.44	2039.81	308.625	8	87.3333	50.6667	134.135	13.3056	10.8056	7.19444	5401.67	1241.36	180.5	31.1667	5217.47	80.5	256.472	77.6111	10958.7	28.1111	94.6389	1603.53	34.3889	9.13889	27.8333	13.5716	389.589	62.0278
A549	48	1058.4	85.8611	408.861	207.833	1065.92	7390.74	4299.31	32489.8	64	300.5	351	9689.78	1994.06	535.753	9.17574	9703.17	12852.7	4406.56	1875.39	1417.61	1421.64	208.792	7.66667	90.6667	53.1667	126.302	5.97222	74.8056	8.69444	5733.67	1583.19	222.333	60	5989.31	72.6667	236.306	110.944	12061.6	26.9444	123.472	2284.19	47.8889	9.47222	25.3333	10.5716	629.756	52.6944
A549	72	809.236	45.1944	392.194	108	1367.25	5137.24	3981.81	32334.2	59.6667	563	294.5	6615.11	1966.39	328.42	10.6757	9256	11156.7	4662.06	1704.89	1110.94	1666.31	118.792	8.33333	104	52.8333	183.802	22.6389	273.639	15.5278	7383.67	1676.03	171.833	78.3333	5119.81	110	425.806	88.4444	11623.6	27.2778	74.3056	3023.19	54.0556	10.4722	23.3333	7.90496	716.756	61.6944
NCI-H358	0	344.403	35.8611	45.8611	60	2.91667	47.7404	90.3056	2870.51	19.3333	607.5	359.167	619.278	1421.39	1331.75	16.6757	4689.67	4115.22	1134.56	2529.06	1704.61	2170.31	186.792	388	106.667	48.3333	102.802	140.806	1	37.8611	589.667	291.194	113	235	3491.14	111.667	403.139	59.6111	4565.22	98.9444	158.639	1400.36	41.7222	11.1389	16.3333	17.405	72.4226	70.1944
NCI-H358	2	370.569	512.028	66.6944	42.3333	1.58333	43.4071	116.139	3203.85	35.3333	617.5	563.667	297.944	525.056	2039.59	16.3424	4036.58	3207.64	1216.72	2898.56	2015.11	3132.47	185.958	355	113.667	51.8333	301.802	421.806	65.4722	28.1944	1272.67	307.194	124.833	165.5	3805.81	97.6667	468.306	53.6111	4380.56	89.4444	193.306	1012.53	49.0556	15.4722	19	15.5716	71.9226	58.6944
NCI-H358	4	435.236	362.194	116.528	26.6667	1	32.0737	248.972	2856.01	42	489.5	469.333	725.778	802.389	2138.42	10.0091	5468	5775.72	1238.39	2579.39	2349.11	2119.81	701.125	560.333	109	53.3333	282.802	154.139	2.47222	16.0278	1721	309.528	124.333	174.667	3889.31	85.5	314.139	60.9444	4607.22	79.2778	221.972	1184.36	54.2222	9.13889	18.6667	10.0716	64.7559	77.5278
NCI-H358	6	363.403	210.194	130.194	44.1667	1.25	46.7404	214.306	2533.35	39	741.5	496.5	1251.94	1014.39	2144.75	13.3424	5400	5588.39	1404.22	2894.72	2489.28	2910.81	574.458	568.333	109	50	173.302	165.306	1	24.8611	1795	292.694	119.333	202	4230.64	104.333	365.972	87.9444	5470.72	92.6111	257.472	1831.36	55.0556	9.30556	23.6667	17.5716	86.0893	75.8611
NCI-H358	8	452.903	307.194	180.028	62.8333	1.58333	46.7404	395.472	3987.68	51.3333	416.333	441.167	1002.44	914.056	2028.59	17.0091	5479.17	6051.56	1428.06	2794.22	2468.11	2463.14	442.125	453.75	100.167	45.5	165.469	122.306	1	21.5278	1418.25	294.028	93.6667	184.333	4006.14	96.8333	336.139	81.6111	5313.06	88.4444	217.639	1362.19	46.8889	11.4722	22.1667	19.7383	84.5893	67.0278
NCI-H358	12	635.569	528.861	173.361	55.3333	3.41667	73.4071	480.472	3260.51	45	872.333	422.5	1248.69	861.556	1998.59	27.3424	5030.58	7515.06	1213.39	2310.72	2173.78	3481.64	264.458	449.667	110	50.1667	134.635	133.806	17.4722	25.1944	1874.17	389.194	83.3333	183.667	4347.47	96.3333	319.472	104.278	5846.56	122.111	257.639	1932.36	61.7222	12.3056	31.6667	34.7383	110.923	66.8611
NCI-H358	16	767.236	412.028	186.861	44.1667	0.583333	85.9071	517.472	3082.01	42.6667	651.833	398.917	811.944	1673.89	2204.75	28.6757	3213.83	5874.06	1230.22	2337.72	2246.86	2092.97	276.792	554.167	96.8333	47.6667	266.802	151.472	19.4722	33.3611	1863.17	467.861	101.5	155.667	4586.31	106.667	243.639	123.611	5321.72	125.278	243.306	1510.69	67.7222	14.1389	32.5	39.5716	103.423	64.1944
NCI-H358	20	815.569	685.694	257.361	41.1667	6.58333	57.0737	572.139	4107.35	53	396.5	502	1077.53	1413.81	1857.75	17.8424	4250.25	6267.56	1227.47	1715.72	2326.19	2633.97	491.958	498.333	109.333	53.6667	303.302	146.972	23.6389	27.1944	2182.33	455.694	84.5	140.833	4539.64	109.833	287.472	133.278	5394.89	129.611	264.972	1292.19	65.3889	14.8056	32	27.0716	87.4226	56.6944
NCI-H358	24	677.069	552.861	191.528	37.1667	2.25	114.74	364.306	1803.68	28.3333	328.667	510.333	1345.94	1090.39	2012.75	30.5091	4718.5	6622.72	1244.72	2793.22	2432.78	3012.31	354.458	517.167	106.333	47.3333	217.802	139.472	45.3056	29.6944	2292.67	456.528	62.8333	116	4336.81	107	241.472	120.278	5053.56	116.278	240.972	1920.69	67.2222	12.1389	35.1667	45.2383	112.423	87.5278
NCI-H358	36	881.569	409.194	264.528	58.1667	5.25	143.24	574.472	5635.01	44.5	557.333	584.833	1757.11	1526.56	2209.75	34.3424	4679.5	6186.56	1379.39	2732.56	2550.78	4211.14	667.125	636.167	109.333	50.6667	224.969	88.8056	15.1389	26.5278	2825.17	593.528	100.167	153.333	5067.64	102.167	197.472	127.611	5349.39	124.778	275.306	2220.86	82.0556	9.47222	46.6667	62.5716	143.589	65.0278
NCI-H358	48	1313.74	496.528	349.528	34.6667	3.91667	66.0737	685.472	13336.7	47.8333	231.667	605.833	1304.11	1859.56	1080.42	25.3424	4162.33	5686.89	1392.22	2484.56	1922.61	2256.47	233.625	343.667	103	51.6667	293.302	135.639	5.80556	38.5278	1899.67	559.028	62.8333	126.5	5003.14	123	174.639	171.278	4493.39	120.778	248.306	2150.36	73.3889	8.80556	52.6667	24.2383	91.0893	57.6944
NCI-H358	72	977.403	242.861	449.028	67.6667	12.5833	49.7404	650.639	17854.2	55.1667	204.667	429.5	1159.61	2677.22	1952.09	17.1757	3598.17	5062.72	1402.06	2440.22	1181.44	2677.14	126.292	348	118	55.6667	308.969	109.972	60.9722	50.0278	1901	535.694	38.6667	98.3333	5349.47	130.833	203.306	252.611	4233.89	91.9444	174.639	3728.03	79.5556	6.13889	48.3333	22.7383	128.089	94.3611
NCI-H1299	0	1260.24	104.194	103.361	67.6667	2.91667	23.7661	207.806	748.514	47.8333	91.5	460.833	408.444	1888.06	351.406	12.3764	6527.17	3627.39	945.056	2340.06	905.111	71.6389	1	48.1667	97.3333	53.5	132.323	398.972	515.639	35.8611	626.667	287.361	783.667	368.167	6019.81	92.1667	218.639	138.944	735.889	93.9444	129.639	269.861	35.5556	8.30556	57.1667	28.4706	121.647	100.361
NCI-H1299	2	1615.9	598.361	144.528	60.6667	6.91667	1	284.472	1163.35	44	104.167	675.667	345.111	1938.89	380.034	6.87829	5402.67	5273.56	1435.39	2748.39	754.444	197.639	48.9583	82.3333	100.833	58	217.495	1509.14	1561.64	36.1944	1249.83	339.528	1111.67	453.333	6677.64	110.333	590.972	173.778	913.222	112.278	168.972	432.861	58.8889	9.13889	85.3333	4.73691	59.2624	83.8611
NCI-H1299	4	1293.57	381.028	196.861	71.6667	6.58333	5.59906	212.472	499.514	54.6667	138.333	484.833	652.778	2183.22	989.87	12.6095	6459.5	4452.89	1029.72	1811.56	906.111	158.306	85.4583	91.3333	108	58.5	285.474	1042.64	845.472	36.8611	820.167	266.361	1329.33	503.833	6789.81	118.833	1014.97	243.444	1212.39	118.444	219.306	457.528	43.5556	10.8056	60.3333	11.2359	68.9149	75.3611
NCI-H1299	6	1365.07	485.861	322.028	55.1667	6.25	1	419.972	1044.35	52.8333	105.667	329.333	954.944	2068.06	699.225	8.7704	6379	3415.39	1143.06	1288.39	957.444	170.972	292.958	97.1667	120	69	177.185	445.639	560.639	34.8611	1024.5	191.028	852	387.667	6178.81	106.5	612.972	245.278	1013.89	113.944	260.972	401.694	59.2222	11.8056	51.8333	1	59.3173	87.1944
NCI-H1299	8	1150.9	463.028	352.194	36.3333	1.58333	1	298.472	281.181	43.6667	46	541.333	969.278	2328.22	771.729	2.73758	6313.33	5855.06	1099.89	3548.89	1405.61	248.639	128.125	86.8333	100.667	55.5	285.694	425.306	571.139	31.6944	1048.17	263.528	949.833	405.333	6581.31	95.6667	444.472	267.944	1155.89	112.111	289.639	551.861	72.0556	5.47222	62.3333	10.7972	65.8711	111.528
NCI-H1299	12	1793.74	846.861	421.028	46	4.08333	1	511.139	205.014	60.8333	41.1667	649.833	818.611	1500.72	400.162	1.06484	5507.33	6587.22	1215.06	3597.72	1156.11	461.806	57.7917	82.8333	88	44.6667	188.428	540.639	1493.97	33.5278	1301.67	438.528	757.167	325.833	7819.31	102.833	379.806	255.444	1300.06	118.778	271.639	714.694	77.7222	1.80556	80	1	38.0927	199.861
NCI-H1299	16	1665.57	1373.69	388.194	22	3.91667	29.1271	317.972	247.514	48.8333	15.3333	415.167	539.944	2531.39	693.933	15.3517	5645.67	4238.72	810.056	3216.06	1070.94	216.639	78.125	73	90.8333	52	331.022	432.639	828.472	34.5278	1103.33	479.194	526.667	264.5	7652.81	91.6667	247.472	319.278	1363.39	112.444	265.639	727.694	77.7222	4.13889	77.3333	51.08	91.73	91.0278
NCI-H1299	20	1772.57	1599.53	521.528	39.5	2.08333	35.0502	393.806	201.014	58.8333	43.6667	333.333	1065.78	2638.89	592.554	15.3791	5682.33	2818.39	719.222	3292.72	979.944	211.972	99.7917	71.6667	85.6667	48	301.461	403.639	868.639	35.1944	1118.67	503.861	531.667	238.667	7938.64	91	215.139	414.944	1462.72	131.778	274.306	851.861	81.5556	5.47222	94.1667	65.9975	166.098	136.028
NCI-H1299	24	1928.9	2518.53	571.528	68.6667	4.75	25.5348	456.806	195.847	70.8333	81	325	645.778	2737.06	919.697	20.8909	5843.67	3968.89	741.222	2349.56	822.444	133.139	52.2917	61.1667	92.6667	53.6667	273.217	256.306	738.139	34.8611	975.5	386.028	429.167	205	7140.64	91.6667	212.806	319.111	1079.89	111.778	203.306	594.861	58.0556	2.80556	82.6667	37.8626	104.646	153.528
NCI-H1299	36	2455.24	1455.69	834.861	61	9.91667	23.341	537.306	784.681	75.6667	99.6667	404.5	1300.11	3994.89	1091.5	28.6513	5545.17	3019.06	725.056	2345.39	937.611	229.972	133.458	94.5	90	49	312.403	226.639	894.639	34.5278	1493	507.694	634.667	254.667	7715.47	90.3333	196.306	669.611	1438.06	153.944	302.972	758.861	73.5556	4.80556	158.167	48.2007	110.048	284.028
NCI-H1299	48	1979.74	1022.86	884.694	60	5.91667	51.5856	408.306	969.181	89.3333	59.8333	608.667	999.944	5771.22	1473.87	42.6913	5232	2319.39	549.389	2328.72	514.444	266.139	121.208	119.833	69.8333	37.5	420.034	519.306	2453.64	32.0278	1945.67	554.944	815.833	298.917	7822.31	75.8333	171.806	1301.78	1322.72	193.278	267.972	842.028	58.0556	5.47222	217.667	72.1126	240.658	1455.86
NCI-H1299	72	1830.57	873.528	1087.36	78.8333	11.0833	67.9017	346.306	1048.68	189	72.5	249.167	766.944	5780.89	2067.83	43.9527	5527.5	1685.72	495.222	2167.39	409.111	410.972	87.7917	142.667	82.6667	44.6667	394.531	477.306	3315.81	35.5278	2320	398.944	524.833	198.25	7257.39	77.3333	174.639	1581.11	1406.72	207.444	183.972	645.194	45.8889	6.47222	106.667	128.986	312.833	3553.53
NCI-H1573	0	399.903	82.1944	107.361	281.167	514.583	2877.8	401.139	203.847	52.1667	109	364	1192.94	2754.89	1868.58	40.1539	2107.17	7799.06	1740.72	1930.39	1352.94	641.806	98.7917	40.5	93	58	104.128	47.4722	166.139	24.1944	1322.33	116.528	139	6	5040.47	88.8333	260.972	110.278	1963.39	79.7778	61.9722	247.194	23.2222	2.80556	18	27.807	116.057	179.694
NCI-H1573	2	505.736	444.694	113.028	324	1696.42	4126.78	560.639	386.847	50.3333	161.333	407.5	803.278	2008.72	2262.27	40.9962	2129.83	7782.89	2018.39	2461.89	1651.94	2912.14	303.625	73.6667	110	57	178.083	164.639	820.139	26.3611	3383.33	136.694	178.167	6.66667	5574.31	115.833	644.972	150.278	2568.72	79.6111	118.306	360.361	29.7222	4.47222	18.8333	19.8893	81.8588	123.528
NCI-H1573	4	536.069	443.694	160.194	336.5	2554.42	4460.93	608.639	351.514	45	248	418	2110.44	2688.72	3073.09	28.8669	2578.67	7698.39	1972.72	2238.56	1758.94	3078.31	603.458	124.5	125	61	137.399	86.4722	304.806	21.8611	3446	168.861	210.167	39.1667	6398.64	117.333	834.306	177.611	2919.72	73.1111	117.806	417.694	28.0556	2.63889	18.6667	12.3084	83.9646	165.361
NCI-H1573	6	513.069	412.694	180.194	863.167	2845.92	3948.97	600.472	298.514	42.3333	186	407.5	2445.44	2151.89	2520.61	40.8278	2586	7152.89	1938.39	2181.06	1673.44	2081.14	1040.29	133.5	116.333	61	167.386	76.6389	296.639	25.1944	3048.33	114.361	194	52.1667	6455.64	107.5	558.639	171.778	2577.39	69.6111	100.306	373.028	23.0556	1.47222	19.6667	25.3643	94.2408	158.028
NCI-H1573	8	705.236	710.194	254.528	442.667	3687.08	5993.01	826.806	459.014	48.6667	295.833	386.333	1850.78	2197.39	3536.36	60.6221	2757.67	7533.06	1882.22	2273.22	1669.61	3157.64	1221.46	129.833	111.167	56.1667	142.706	59.3056	369.806	24.5278	3108.5	110.694	282.833	66.1667	6541.97	100	503.806	170.278	2452.39	80.9444	108.306	706.028	27.5556	2.13889	21.3333	58.8884	127.26	38.0278
NCI-H1573	12	457.569	673.528	195.528	482.167	6581.08	11770.5	504.139	177.681	43.6667	287.833	368.167	1412.78	2079.39	3108.8	59.0217	2280	7456.39	2028.06	2286.06	1644.28	1953.81	685.792	84.3333	102	60	201.247	61.3056	423.972	23.8611	3071.83	116.028	273	53.3333	6256.97	99.6667	382.139	148.944	2305.39	83.7778	91.4722	433.194	27.7222	1.97222	26.1667	65.9638	117.91	192.361
NCI-H1573	16	549.736	785.028	255.694	1347.33	4609.25	5818.32	426.139	90.0139	58.5	350.333	402.667	2574.61	3602.22	2174.42	46.8924	2553.83	6952.22	2220.72	2175.39	2013.94	1249.64	1012.62	172.167	90	48	136.725	79.1389	76.4722	31.6944	1915.17	163.528	194.333	30.3333	6462.97	114.5	635.139	223.611	3019.72	92.2778	107.806	568.028	35.0556	4.47222	26.1667	32.7767	147.559	159.361
NCI-H1573	20	624.736	851.194	265.861	1080.67	4695.08	10495	354.472	45.0139	59	226.5	375.167	2439.28	2837.56	2659.76	54.2205	2262.17	7365.56	2183.06	2026.22	1895.94	737.306	659.625	120	85.3333	51	146.917	62.8056	7.30556	33.5278	1277.33	177.028	216.167	53	7106.81	106.667	414.472	186.278	2915.39	81.7778	85.9722	549.194	31.7222	4.80556	27.3333	57.1196	132.566	143.194
NCI-H1573	24	526.069	927.361	272.694	1133.17	4879.75	16792.2	262.472	29.5139	50.6667	157.333	324.833	3117.11	3279.22	3450.44	32.91	2549	8236.06	2087.06	2125.22	1771.11	693.972	1159.46	130.833	76.6667	45.3333	132.177	62.1389	19.4722	30.5278	1203.33	195.861	152	37.6667	6912.64	106	369.139	214.944	2943.06	93.2778	88.9722	568.361	30.0556	3.80556	24.5	53.4976	131.134	171.194
NCI-H1573	36	648.236	867.528	343.861	3235.17	7674.25	11096.9	414.806	56.1806	56.1667	136.333	287.667	2646.11	3865.22	2014.55	23.4761	2120.83	4850.39	2261.89	2098.22	1822.11	547.139	773.292	71	83.5	46	111.456	46.9722	17.4722	26.5278	1118.33	274.694	239.667	98.1667	8109.14	93.3333	322.472	250.611	2720.06	100.611	100.139	579.861	30.5556	2.47222	27	16.4358	113.782	173.528
NCI-H1573	48	516.069	574.361	366.861	2881.67	8983.92	10532	306.972	148.181	47.3333	177.833	251.5	2359.11	5146.89	2163.39	36.7004	1971.67	5318.89	2401.72	2356.89	1788.78	847.639	1129.62	62.8333	88.3333	51	238.645	59.4722	61.4722	33.3611	1298.5	323.861	285.667	136.333	8315.47	111.5	402.806	331.611	2377.22	109.778	107.806	551.528	35.7222	2.13889	28	48.1068	217.808	173.361
NCI-H1573	72	433.736	203.194	460.528	1111.83	13746.9	58.5742	285.472	1119.35	50.3333	91.5	226.167	1674.44	7013.89	1	37.4585	1737	3038.72	2258.56	1903.89	1601.94	2290.81	2847.46	41.3333	103.5	58.6667	361.623	54.9722	237.972	30.8611	3426.5	313.194	373.833	131.833	8077.81	110.333	577.306	430.611	2012.06	141.944	138.306	558.028	43.7222	2.13889	29.5	1	107.971	296.028
NCI-H1975	0	1221.24	29.3611	96.1944	26745.5	4893.58	16135.9	176.972	5265.35	52.8333	630.833	720	2001.61	2195.72	1847.09	11.6757	2413.67	6839.72	4395.56	2167.56	1431.11	496.639	401.458	176.667	145.833	69.3333	192.802	216.472	177.139	20.5278	4569.33	310.361	745.167	191.5	5131.47	103	332.306	106.444	3067.56	92.7778	104.306	1012.19	26.0556	3.80556	15.3333	4.07163	61.9226	32.1944
NCI-H1975	2	1220.9	73.1944	81.8611	20795.7	4949.92	15737.4	136.806	3222.18	57.6667	543.667	678	513.111	1183.89	2778.42	11.0091	1905.33	7644.89	4213.89	2350.72	961.778	343.806	107.292	156	161.5	79.3333	220.802	232.139	100.306	18.5278	4572.17	254.528	612	154	4607.14	95.6667	300.472	127.278	2616.22	63.9444	109.972	644.194	22.3889	4.47222	14.3333	6.90496	44.4226	24.8611
NCI-H1975	4	1541.4	73.8611	162.361	32471.8	7635.25	16485.9	288.472	6699.51	66.5	1107.83	1131	4439.11	1636.22	4086.75	16.3424	2944.67	8279.72	4801.72	2337.22	1985.61	1545.31	1183.96	383.333	159.333	78.5	344.969	455.472	213.306	20.0278	6730.5	218.194	728.833	172.5	4791.64	110.333	537.972	234.611	4352.39	86.9444	196.639	1281.36	28.7222	5.80556	16.8333	6.2383	65.5893	27.3611
NCI-H1975	6	1399.07	56.1944	185.028	26695.3	8760.08	16278.1	358.972	7706.68	56	477.833	836.833	3536.44	2029.39	3005.09	10.0091	2839.25	7896.22	4564.89	1850.89	1576.61	544.472	897.625	260.833	153.5	77.6667	296.135	315.806	142.472	18.3611	3942.5	186.694	909.5	206.167	4577.97	100.167	376.639	224.278	3996.39	85.6111	220.139	980.361	26.0556	15.8056	17.6667	1.7383	53.9226	34.3611
NCI-H1975	8	897.236	88.5278	164.194	26949.3	12013.6	16619.7	180.972	5300.51	45	610.667	917.5	3019.61	1532.06	2520.75	18.0091	2339.17	9783.39	4122.56	2777.06	1614.61	631.806	446.458	217.167	152.5	68.6667	244.969	321.639	241.472	20.1944	4410.67	206.361	943.833	210.667	4817.97	97	408.139	228.611	4062.22	80.4444	192.972	642.694	33.0556	3.80556	24.8333	9.7383	73.9226	220.861
NCI-H1975	12	1726.24	94.1944	235.361	32336.8	15543.6	16317.1	446.639	7007.01	57.6667	803.167	801	2526.28	1479.06	1834.42	22.0091	2128.5	8460.06	4546.56	3750.39	1288.61	588.972	152.792	164.333	153	75.3333	155.302	210.472	202.139	23.5278	3928	270.694	963.667	266.167	5450.64	100.833	353.306	234.444	4001.06	95.2778	152.306	1831.03	24.3889	6.47222	42.6667	10.2383	107.256	41.5278
NCI-H1975	16	1658.9	310.528	457.194	26365.5	25650.9	16643.4	336.139	2430.85	51.3333	246	711	4642.44	2818.06	2174.59	9.00908	2348	9506.06	5511.89	4135.89	1746.44	985.806	950.625	253.667	166	72.3333	420.635	146.806	343.306	21.8611	5189.17	550.028	997.167	301.833	7354.14	100.333	304.306	331.944	2588.72	129.278	168.972	1256.53	36.8889	5.47222	23	1	72.0893	62.3611
NCI-H1975	20	1705.74	305.861	490.361	27264.8	27657.6	16837.7	377.306	1870.35	66.8333	218.333	830	6335.61	2803.22	2026.75	4.00908	2542.17	10645.2	5724.22	4337.72	1570.94	1003.31	1137.62	257	152	68.5	457.802	125.806	392.639	21.5278	5815.83	528.694	614.167	191	6868.64	106.167	300.472	294.944	2177.72	121.944	146.806	968.528	33.3889	4.47222	21.8333	1	64.0893	70.0278
NCI-H1975	24	1900.24	300.694	454.028	28464.5	23766.4	15966.6	416.806	3719.51	64.1667	339.333	724.167	5343.44	2286.89	1913.59	6.84241	1907.67	7828.72	5437.72	3601.39	1767.44	1042.31	1254.62	249.667	142.5	71	443.802	143.639	373.472	22.8611	5411	537.861	815.833	257	6845.47	100	300.472	312.444	2656.39	122.944	177.972	1263.53	37.5556	3.13889	23.8333	1	70.7559	70.3611
NCI-H1975	36	2083.9	181.194	462.361	24776.5	25567.9	16158.2	572.306	5053.85	86	264.333	992.5	5463.78	2898.72	1521.75	7.34241	1806.33	9774.06	6185.22	4491.72	1736.61	739.972	435.958	212	159.333	74.6667	491.802	103.972	522.139	21.8611	6261.33	560.194	442.5	133.667	6721.81	92	190.639	320.444	2653.72	119.944	146.639	1414.53	43.5556	2.47222	37	1	81.4226	94.6944
NCI-H1975	48	1928.07	96.6944	544.028	23325.5	25273.4	15476.6	455.972	8542.01	64	187.167	675.333	5421.28	2803.06	1818.75	13.3424	1320.67	6726.39	6347.56	3334.06	1369.78	718.639	347.292	165.167	171	72	719.469	144.972	824.639	28.5278	6146.5	657.361	300.333	112.667	6771.31	95.6667	207.806	600.111	3015.39	129.778	140.972	1750.36	50.7222	6.47222	36.5	4.90496	117.756	191.194
NCI-H1975	72	1864.57	63.1944	815.861	19783.7	22970.6	15423.9	322.806	11413.3	67.6667	423.333	377.833	3892.78	4458.06	1823.25	8.75908	1843.67	6403.22	7141.06	3028.56	926.278	953.139	129.458	96	214.333	83	1036.55	150.639	1192.14	27.1944	6084	725.694	167.667	98	5162.31	98	204.306	707.278	4018.89	129.944	135.306	1875.53	42.0556	15.8056	25.5	10.7383	168.089	403.361
SW-1573	0	697.903	41.5278	65.5278	336.5	120.917	5336.41	3655.81	9431.68	94.6667	83	1431.33	4616.61	574.222	351.086	33.3424	7930.33	9475.72	2100.72	1178.89	965.444	346.972	488.958	80	97.5	55	352.135	434.972	235.972	26.0278	913	124.694	11.3333	13	7.63889	75.6667	144.639	51.6111	14097.6	32.1111	98.3056	1654.69	19.0556	15.8056	57.6667	28.405	76.0893	45.0278
SW-1573	2	594.569	340.361	66.6944	418.667	300.917	5918.74	3340.64	7626.18	84.8333	111	2054.17	1611.11	528.722	341.586	17.5091	6415	9709.89	2460.89	1284.56	1092.44	573.639	932.625	84.1667	122.333	75.6667	695.302	1239.47	486.639	21.8611	967	169.361	127.5	34.8333	13.8056	79	183.472	41.6111	13137.1	35.2778	90.1389	1467.03	19.7222	15.8056	62	11.2383	53.0893	47.3611
SW-1573	4	534.569	270.861	69.6944	174.833	698.25	6903.74	4047.14	7368.68	61.5	58	954	1762.78	589.889	260.253	22.6757	7362	9759.56	1656.39	1169.39	968.444	431.139	198.292	88.3333	140.333	77.1667	386.969	1117.97	580.139	14.1944	918.833	107.194	71.5	26	3.47222	73.5	170.472	53.9444	13052.7	40.6111	68.3056	2062.86	19.0556	19.1389	84.6667	6.07163	50.7559	48.6944
SW-1573	6	604.569	194.528	87.8611	1088.67	1135.92	8655.07	4832.64	11599.3	70.8333	182	1158.67	2987.11	703.222	238.253	30.5091	7464.33	9015.39	1851.72	1350.56	801.278	545.972	814.625	99.6667	122	70.1667	367.802	809.139	370.139	22.6944	1153.17	155.361	58.6667	19.3333	11.4722	74.3333	208.806	47.9444	14085.6	32.9444	93.9722	1752.36	15.7222	12.8056	69.5	23.905	65.2559	41.0278
SW-1573	8	447.903	153.028	65.5278	1314.83	1558.92	10252.1	4325.31	8025.18	65	181.833	793.667	3238.94	514.889	319.42	28.0091	7188.5	9851.39	1741.89	1167.22	739.111	640.972	955.458	85.6667	108.333	64.3333	451.802	736.139	364.139	20.8611	1068	127.194	22.8333	1	16.1389	83.3333	177.306	49.9444	13238.9	30.9444	93.3056	1824.03	17.7222	10.4722	75.3333	21.905	61.7559	44.3611
SW-1573	12	426.903	248.861	65.3611	2152	2152.92	12332.6	4384.14	6570.01	63	310.667	784	2294.94	483.056	530.753	28.6757	6753	10610.1	1702.06	1185.06	806.444	551.306	1048.12	86	107	62.3333	561.969	898.972	401.139	23.5278	1079.67	162.361	25	11.3333	19.3056	85.3333	219.972	56.9444	13285.9	34.9444	97.3056	2052.86	20.0556	12.8056	78.8333	26.5716	66.5893	51.8611
SW-1573	16	415.569	383.028	77.8611	2194.83	7000.25	15353.7	4300.31	8963.01	56.8333	315.667	585	5394.94	524.556	713.086	18.0091	7186	12271.2	1634.06	1187.89	1022.78	578.972	1459.12	98	107.667	61	1358.8	1369.64	677.806	18.1944	1590.33	155.028	41.8333	12.5	18.4722	61.6667	180.806	89.2778	13110.1	50.6111	71.9722	3102.03	20.7222	17.1389	78.6667	13.0716	64.4226	58.6944
SW-1573	20	559.736	414.861	93.0278	1694	6290.92	15078.2	4555.64	8878.01	64.5	230.333	713.5	4193.78	632.722	695.086	18.1757	7670.5	12146.9	1772.22	1158.89	982.111	462.639	1651.79	106.5	115.667	72	1728.8	1642.47	594.139	23.8611	1591.67	167.528	93.3333	41.5	22.6389	70	123.972	67.2778	12128.2	34.4444	47.4722	2306.36	15.7222	13.1389	53	11.5716	57.0893	46.0278
SW-1573	24	515.069	399.694	83.8611	1096	4198.58	12938.6	4376.47	7861.51	66.3333	92.5	846.667	3009.44	821.389	463.92	18.8424	6430.5	11512.1	1930.39	1266.39	1226.28	344.306	649.625	100.833	107	73.5	1651.97	1841.97	772.306	26.1944	1394.67	117.861	9	1	3.80556	71.3333	136.972	70.1111	13948.6	33.6111	53.9722	2648.69	18.7222	13.1389	69	9.90496	61.2559	54.0278
SW-1573	36	565.569	426.028	102.694	1742.17	12279.8	15150.4	5468.14	22041.5	85.8333	281.667	738.833	4384.11	787.389	772.586	32.1757	7402.83	11893.6	1797.89	1428.22	1174.28	748.806	539.625	124.333	133.667	113.833	1376.64	3576.97	662.639	23.1944	1796.67	104.028	20.1667	1	4.47222	74.3333	152.972	105.944	12530.4	34.6111	87.3056	3242.53	18.3889	12.8056	47	25.0716	98.7559	344.028
SW-1573	48	600.069	345.528	103.361	1578.83	9802.08	14691.4	5869.31	25452	74	330.667	584	3204.94	950.722	647.086	15.3424	7469.83	8978.39	1957.06	1438.72	1013.28	464.472	783.125	120.667	112.667	77.8333	1744.14	3394.14	1141.64	30.3611	1780.5	153.528	30.5	16	14.4722	86.8333	121.139	123.944	14242.4	44.2778	123.306	3541.53	21.3889	15.4722	49.1667	8.40496	66.2559	440.361
SW-1573	72	692.903	113.694	103.028	1979.83	8426.58	9540.91	6682.47	24229	71.3333	623.167	400	1349.44	612.056	388.42	13.6757	6068.83	8803.56	1905.56	1478.22	559.111	771.972	1059.46	139.667	116.333	73.6667	1480.3	2475.81	1458.81	26.0278	3236	149.528	3.16667	26.5	7.13889	83	96.1389	80.7778	14875.6	51.9444	64.9722	3420.36	20.8889	13.8056	41.8333	4.90496	54.9226	657.028
